# Supplementary material
Source: publisher figshare collection journal article supplement (https://tandf.figshare.com/ndownloader/files/16534670)
Supplement: Supplementary file 1 [file 16534670]

Supporting information

Contents

[1. ICAT SD guidance 1](#_Toc6387804)

[2. Stakeholders interviews 1](#_Toc6387805)

[3. Impact categories included and excluded from the assessment 7](#_Toc6387806)

[4. List of assumptions and modelling of the baseline scenario 9](#_Toc6387807)

[5. List of assumptions and modelling of the policy scenario 11](#_Toc6387808)

[6. LCA methodology and modelling 12](#_Toc6387809)

[7. Life Cycle Inventory 12](#_Toc6387810)

[8. Full LCA results 23](#_Toc6387811)

[9. Summary of data sources 28](#_Toc6387812)

[10. Summary of qualitative impact assessment 33](#_Toc6387813)

[11. Links between impact categories and SDGs targets 35](#_Toc6387814)

[12. Calculation of CO2 abatement cost 36](#_Toc6387815)

[13. Quantitative relative improvements on SDG targets 37](#_Toc6387816)

# ICAT Sustainable Development guidance

Available at: <https://climateactiontransparency.org/icat-guidance/sustainable-development/>

Link for download: <https://climateactiontransparency.org/wp-content/uploads/2018/05/ICAT-Sustainable-Development-Guidance-May-2018.pdf>

ICAT website: <https://climateactiontransparency.org>

# Stakeholders interviews

Stakeholders’ consultation was considered important to ensure the bottom-up part of the approach and make in this way the assessment more comprehensive. Furthermore, it helped in filling some of the knowledge gaps caused by the lack of familiarity with the local conditions.

Stakeholders were for the most interviewed at the Africa Climate Week between the 9th and 12th April 2018 in Nairobi, where the 10th Africa Carbon Forum (ACF) took place.

The consultations can be classified as a low level of stakeholder’s engagement, according to the ICAT Stakeholder Participation guidance (Climate Community & Biodiversity Alliance & VCS, 2017), aimed at obtaining inputs on the analysis and providing the interviewed with information to better understand the problem. The outcomes of the consultations were used mainly to identify relevant impact categories and specific impacts. More specifically, the findings were used to integrate and correct the original choice of impact categories and gain further insight on the impacts of rural access to electricity.

Stakeholders were chosen from the following three group:

- Stakeholders involved in mini-grids in Kenya
- Stakeholders involved in SD in Kenya
- Stakeholders involved in mini-grids in Sub-Saharan Africa

Table 1 presents an overview of the stakeholders interviewed, specifying their organisation and the role which they have in relation to the assessed policy.

Table 1. Overview of stakeholders interviewed.

| Organisation | Stakeholder’s category | Activities |
| --- | --- | --- |
| Ministry of Energy and Petroleum of Kenya | Policy-maker | Energy policies. |
| Climate Change Directorate of Kenya | Policy-maker | Policies mainly related to forestry, agriculture and climate change. |
| GIZ Kenya | Expert – consultant | Promotion of Solar-Hybrid Mini-Grids. More specifically: capacity-building, system sizing, support of partners, and involvement in mini-grid programs. |
| National Renewable Energy Agency (NREA) | Expert – consultant | R&D for government consulting in renewable energy sector. Contact person specifically focused on mini-grids. |
| AESA East Africa | Consultant | Economic analysis, technical assistance and management services in development field.  Interested in getting involved in mini-grids. |
| Finance Innovation for Climate Change Fund – FICCF  & World Bank | Finance | Finance for smart-agriculture. Involved, although not the interviewed person directly, in energy sector as well. |
| Green Peace Africa | NGO | NGO focused on environmental issues. Contact person specifically focused on energy sector. |
| Off Grid electric | Private sector | Solar Home System (SHS) manufacturing company operating in Sub-Saharan region. |
| Climate Care | Consultant | Environmental and social development projects. Consultancy services to agencies, governments and NGOs mainly on clean energy and climate change. |
| Kenya Industrial Research and Development Institute | Consultant | National research institution with focus on engineering, energy, environment among the others. Co-operation with government and other organisations and institutions. |

When asked to point out which important impacts this policy would have, and which impacts it would be important to measure:

- All the stakeholders appeared mostly focused on the social and economic impacts, rather than the environmental.
- All the stakeholders were more likely to report local impacts rather than global impacts, with the exception of climate change.
- With regards to climate change, it was mostly reported as important due to its legal consequences (e.g. NDCs, donors) rather than the actual impacts on the communities.
- Economic activities, education, agriculture/food, climate change and indoor pollution were the most reported impacts.
- Health (believed to be linked with indoor pollution) and cost of services were also largely reported.
- Access to healthcare, access to water and use of cell phones were reported by a third of the interviewed.
- Other reported impact categories consisted of jobs, economic growth, poverty impacts and similar.
- Only two negative impacts were reported. The first one, related to costs of connection and electricity. The second one consisted of maintenance, which would be a problem especially for public mini-grids and would arise by the lack of skills and structure, resulting in problems such as wrong handling of used PV batteries.

When asked to rank a selected set of impact categories according to the importance, the impact categories getting more attention were:

- Education
- Economic growth
- Water use/access
- Employment
- Expenses for electricity
- Healthcare and economic inequalities, although on a lower level

**Additional information on the interviews**

The interviews were kept relatively short (around 20-30 minutes), using a semi-structured format, as articulated below:

1. The interviewer gives a short introduction on ICAT and the assessment.
2. The interviewed person introduces herself, her position and her knowledge on mini-grids.
3. The interviewed is asked to point out which impact categories she would monitor to perform the assessment, based on what she finds more important. The interviewed would typically report impacts that she believes are affected by electrification/mini-grids and that she finds relevant.
4. The interviewer shows to the interviewed the impact categories currently included in the assessment (please note that at the time of the interviews the categories differed from the ones presented in this report). The interviewed is asked to score each of these categories by its relevance (low-medium-high).
5. Optionally, the interviewed is asked to pick up one to three categories that she or the interviewer finds interesting and identify specific impacts within those categories through, for example, causal chains.
6. The interviewer shares the partial results of the study and the findings are discussed by both parties.

The results of the ten interviews conducted are reported below, anonymously.

Interview 1

Relevant impacts (general)

Agriculture, activities in the community, climate implications, maintenance (especially for public mini-grids) due to the lack of structures and skills, battery treatment, education (in the long run), health due to indoor pollution.

Relevant impact categories (from the list)

High: Economic growth, access to mobile, economic activity, economic inequalities

Medium-high: employment, expenses for electricity

Medium: education, GHG emissions, air quality, share of electricity from renewables, food, indoor pollution, healthcare

Low: Soil pollution, water use, land use, fossil and mineral resource depletion, water quality

Other points discussed

Education might not be so realistic and important as an impact. If the family wanted to invest in that, they would have done so already. In the Talek project (Kenya) business were founded and people moved to town after the arrival of electricity. Batteries might not be recycled and stored somewhere temporarily, because the collection system is not reliable.

Interview 2

Relevant impacts (general)

Livelihoods, agriculture, cell phones, indoor pollution, schools-education, job creation on PV, education at home, economic improvements at country level, emissions of GHG for NDC.

Relevant impact categories (from the list)

High: education, economic growth, water use, fossil and mineral resource depletion, share of electricity from renewables, poverty, employment, economic inequalities, indoor pollution, access to electricity, expenses for electricity, healthcare.

Medium: GHG emission, land use, air quality, water quality.

Low: internet access.

Interview 3

Relevant impacts (general)

SDG 1 (no poverty), SDG 3 (good health and well-being), SDG 8 (decent work and economic growth), SDG 13 (climate action).

Relevant impact categories (from the list)

High: Economic growth, GHG emissions, water use, air quality, share of electricity from renewables, water quality, indoor pollution, access to electricity, expenses for electricity.

Medium: education, fossil and mineral resource depletion, economic inequalities, healthcare.

Low-medium: employment.

Low: internet access, eutrophication, land use, poverty.

Interview 4

Relevant impacts (general)

Poverty, food, water access, healthcare, business activities.

Relevant impact categories (from the list)

High: Education, economic growth, GHG emissions, fossil and mineral resource depletion, share of electricity from renewables, water quality, access to electricity, expenses for electricity, healthcare.

Medium: water use, land use, air quality, poverty, employment, indoor pollution.

Low: internet access.

Other points discussed

Healthcare will be affected, because of the possibility of storing medicines, closer health centres and less hospitals running from diesel generators.

Interview 5

Relevant impacts (general)

Cost of electricity, generation of incomes, education, GHG emissions from kerosene, health issues linked with kerosene, access to healthcare, employment creation.

Interview 6

Relevant impacts (general)

Economic development, education, health, agriculture, water.

Relevant impact categories (from the list)

High: education, economic growth, employment, healthcare.

Medium: water use, air quality, indoor pollution

Other points discussed

GHG emissions has been defined as “too academic”.

Interview 7

Relevant impacts (general)

Agriculture/food, healthcare access, indoor pollution, air quality, cost of connection and of delivered power.

Other points discussed

Our assessment should align with what is already there, rather than building something completely different. Nobody will consider the results of the assessment if it is not commissioned by the GoK. The country needs practical solutions that align with their needs and objectives.

Interview 8

Relevant impacts (general)

Resources, limited cost, electricity cost for end user (cost of service), lifetime of the mini-grids vs national grid, maintenance costs, subsidies, indoor air quality, education

Relevant impact categories (from the list)

High: education, economic growth, poverty, economic inequalities, access to electricity.

Medium-high: GHG emissions, internet access, air quality, share of electricity from renewables, employment, indoor pollution, healthcare.

Low: fossil and mineral resource depletion.

Other points discussed

Improved health ultimately has an impact on economy of the family, since less people dye, and this improves resilience. LCA does not show local impacts, but this should be highlighted. Economic impacts can derive from access to mobile and mobile payment systems.

Interview 9

Relevant impacts (general)

Reading, education, economic productivity, phone charging, engagement in the community, water pumping (if the system can pump), use of white goods and electric equipment.

Relevant impact categories (from the list)

High: education, water use, land use, employment, water quality, access to electricity, expenses for electricity, healthcare.

Medium: economic growth, GHG emission, internet access, share of electricity from renewables, poverty, economic inequalities, indoor pollution.

Low: eutrophication, air quality, fossil and mineral resource depletion.

Other points discussed

Access to healthcare can be improved even by simple access to light 24h per day.

Interview 10

Relevant impacts (general)

Improving livelihoods (from personal perspective), cost of delivered powered or cost of services (from business perspective), GHG emission (for donors).

Relevant impact categories (from the list)

High: economic growth, internet access, water use, land use, employment, expenses for electricity.

Medium: education, GHG emissions, poverty, water quality, economic inequalities, indoor pollution, healthcare.

Low: eutrophication, air quality, fossil and mineral resource depletion.

Other points discussed: National grid is normally less reliable than most of the mini-grids.

# Impact categories included and excluded from the assessment

This section explains how the choice of the impact categories to be assessed was conducted and presents the impact categories included and excluded from the assessment.

In order to choose the categories to be included in the assessment three aspects are taken into account:

- Relevance– *for*
  - *the country’s main objectives*
  - *the objectives of the policy*
  - *the SDGs framework*
  - *the stakeholders*
- Significance – *categories significantly affected by the policy*
- Comprehensiveness – *categories should include both positive and negative effects and from all the three dimensions of sustainability*

The main objective of the policy is clear, and, as already mentioned, is to provide access to electricity. Moreover, as specified in the NCCAP, this is believed to enable the social and economic development of the communities.

In terms of broader country’s objectives, as outlined in the Kenya SDG Agenda, the country is focalizing its transformation in six sectors: “Education and Training; Health including HIV and AIDS; Water and Sanitation; Environment; Housing and Urbanization; Gender, Youth and Vulnerable groups” (Ministry of Devolution and Planning of Kenya, 2017). With the new Constitution released in 2010, the focus of development in Kenya has moved towards creating a more equitable and inclusive society. For this reason, aspects such as health, education, freedom from hunger and good livelihoods have gained more importance(Ministry of Devolution and Planning of Kenya, 2017). Another important aspect from the country’s perspective that should be preserved and possibly pushed forward is agriculture, which represents a big share of the country’s economic activities, accounting for 24% of the GDP, and 65% of informal employment in rural areas (Government of Kenya, 2013). Above all, Kenya has outlined four areas of development which constitute its development priorities. These, also known as The Big Four are food security, affordable housing, manufacturing, and affordable healthcare for all.

Furthermore, relevance and significance were assessed looking at literature focusing on the impacts of electricity access in developing countries.

The impact categories belonging to the environmental domain are chosen among the traditional impact categories analysed in Life Cycle Assessment (Rosenbaum et al., 2018). These are in turn based on the definition of sustainable development, as the ability to fulfil present generation's needs without compromising the ability of future generations to meet their needs (Brundtland, 1987). Among the impact categories available in LCA, it was chosen to include in the results of the assessment the ones which were found to be relevant and significant (significant based on the normalized LCA results provided in Table 7).

Table 2. Impact categories included and excluded from the assessment.

| Dimension | Impact category | Relevant? | Significant? | Included? | Brief description and justification for inclusion or exclusions | Indicator(s) selected |
| --- | --- | --- | --- | --- | --- | --- |
| Environmental | Climate Change Mitigation | Y | Y | Y | The replacement of kerosene with a clean source of electricity is expected to impact this category positively. | GHG emissions [t CO2 eq.] |
| Air pollution  (Indoor and Outdoor) | Y | Y | Y | Air pollution, especially indoor air pollution is a high concern category when it comes to the use of kerosene. | PM  [DALY] |
| Human Toxicity (Air, water and soil) | N | Y | Y | The use of hazardous chemical in the production of the PV modules and batteries could affect this category. | Human carcinogenic and non-carcinogenic toxicity [DALY] |
| Depletion of non-renewable resources | N | Y | Y | Shifting from kerosene to PV technologies, might entail some trade-offs between the use of fossil resources and mineral resources. | Mineral resource depletion [USD]  Fossil resource depletion [USD] |
| Other LCA categories* | N | N | N | The impact on these categories is expected not to be significant as confirmed by the LCA. Moreover, they were not found to be relevant. | - |
| Waste generation and disposal | N | Y | Y | The shift in the type of technologies used for electricity purposes will results in change in consumer behaviours and therefore in change in the type and quantity of waste, not to mention the production of e-waste from the PV. | Not quantified |
| Social | Accessibility and quality of health care | Y | Y | Y | Considered both relevant and significant from the stakeholders’ interviews, since electricity can power health centres. | Not quantified |
| Food security | Y | Y | Y | Considered both relevant and significant from the stakeholders’ interviews, due to the link between electricity and agriculture. | Not quantified |
| Access to safe drinking water | Y | N | Y | Considered both relevant and significant from the stakeholders’ interviews, due to the possibility of pumping water. | Not quantified |
| Access to clean, reliable and affordable energy | Y | Y | Y | Relevant and significant. It is the main goal of the policy. | Not quantified |
| Accessibility and quality of education | Y | Y | Y | Considered both relevant and significant from the stakeholders’ interviews, since electricity can power schools and prevent the use of kerosene at home. | Not quantified |
| Gender equality and empowerment of women | Y | Y | Y | Considered relevant because of attention to women in SDGs agenda of Kenya, also considering the introduction of the Bill of Human Rights in the Constitution. | Not quantified |
| Migration | N | N | N | Not relevant, significance really unclear due to lack of relevant studies. | Not quantified |
| Economic | Economic activity at community level | Y | Y | Y | This impact is found to be very relevant for stakeholders and will be likely affected by the policy due to the link between power and productivity. | Not quantified |
| Employment | Y | Y | Y | Employment was found to be relevant for stakeholders and it is highly linked with economic activity. | Not quantified |
| Expenses for electricity | Y | Y | Y | This impact is found to be relevant for stakeholders, and will most likely be affected by the policy due to the drastic change from the baseline scenario. | [USD/month] |
| Income | Y | Y | Y | Income was found to be relevant for stakeholders and it is highly linked with economic activity. | Not quantified |
| Economic growth | Y | Y | Y | It was found relevant by stakeholders and connected with electricity access. | Not quantified |
| Economic inequalities | Y | Y | N | Although it was found relevant by stakeholders, it was not included in the assessment because it overlaps with “income”. The latter was preferred since it is the root cause. | Not quantified |

# List of assumptions and modelling of the baseline scenario

This section presents an overview of the scenario modelling of the baseline scenario, including the processes considered and the main assumptions made. Cumulative results are estimated over a period of seven years[[1]](#footnote-1) (2024-2030). Figure 1 shows, in a very simplified way, the system boundaries adopted to model the baseline scenario, reporting the parts of the life cycle of the products which have been included.


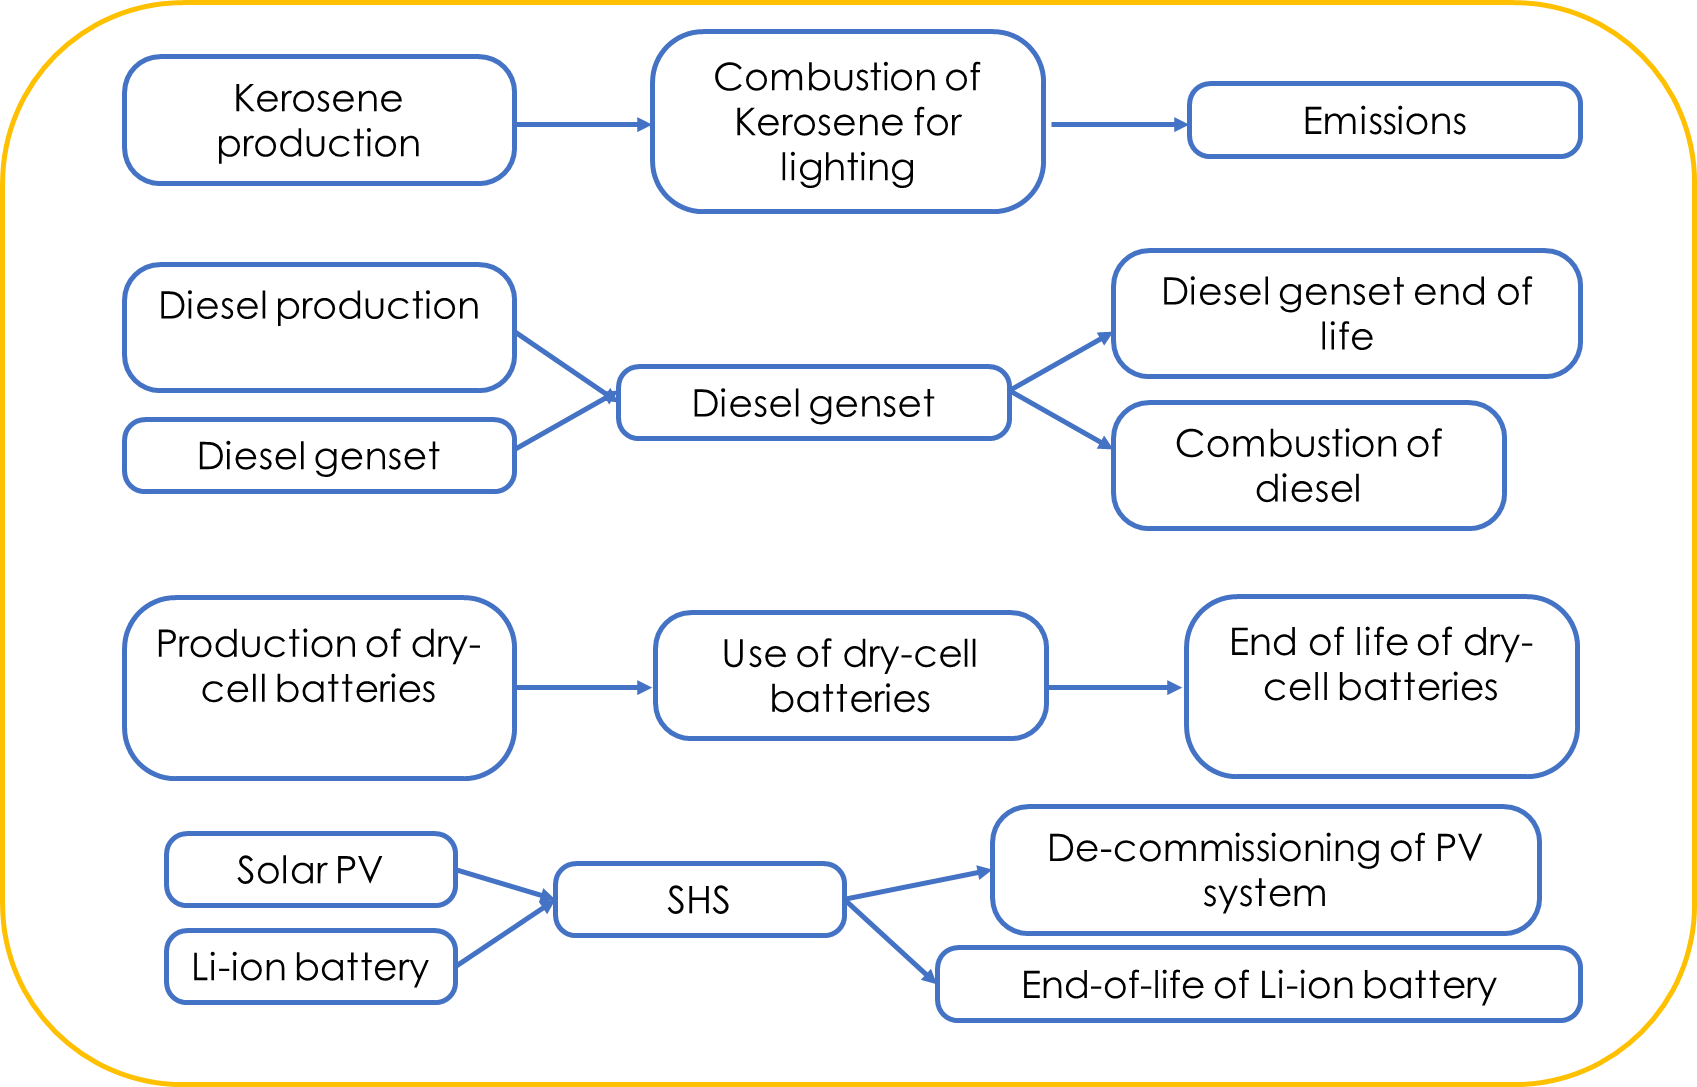


Figure 1. Baseline scenario's system boundaries.

Due to the time constraint, data availability and availability of processes in Ecoinvent (the LCA database used), many simplifications are needed to model the baseline scenario and therefore many assumptions were made. The main assumptions are outlined below:

- Li-ion battery cells, which are dry-cell batteries that can be reused multiple times, are used to represent the dry-cell batteries assessed. Their weight is assumed of 15 g as the most common batteries.
- Kerosene is normally burned in kerosene lamps, which are frequently made from used cans or bottles. These containers are unclear in composition and quantities and are not included in the LCA using the so called “burden free approach”[[2]](#footnote-2).
- Emissions of kerosene are not provided in Ecoinvent and were therefore estimated using data from online sources. The Emission Factors (EFs) used for kerosene’s combustion can be found in Table 3. The EFs in bold are used as a baseline, while the ones underlined are used for the sensitivity analysis (not reported in this paper).

Table 3. Emission factors for kerosene burned in tin lamps.

| Study | PM 2.5 | CO2 | CO |
| --- | --- | --- | --- |
| **(Lam et al., 2012)** | **93 g/kg fuel** | 2770 g/kg fuel | **11 g/kg fuel** |
| ***(Fan & Zhang, 2001)*** | 3.27 g/kg fuel* | 945 g/kg *fuel* | 0.52 g/kg fuel |
| **(U.S. Energy Information Administration (EIA), 2016)** | - | **3190 g/kg** | - |
| ***(Espinosa, García-Valverde, & Krebs, 2011)*** | - | 2.46-6.15 kg/L fuel  (3030-7592 g/kg fuel) | - |
| (Economic Consulting Associates, Trama Tecno Ambiental, & Access Energy, 2014) | - | 2.54 kg/L fuel  (3130 g/kg fuel) | - |

- Other minor sources of light such as candles and wood have not been considered, due to their scarce use.
- Specific data on the generators used by businesses and institutions could not be retrieved. Hence, a diesel genset of 18.5 kWh has been selected from the Ecoinvent database.
- The lifetime of the SHS is quite uncertain and has been assumed to be 5 years.
- All processes have been selected as “Global” due to the lack of more specific processes in the database and due to the lack of data from the real world. For the same reason, the average transportation provided by Ecoinvent are used to simulate the transportation distances.
- Since it was not possible to identify how many institutions were part of the assessed group, these has been considered together with the businesses and have been assumed to have the same energy consumption as the businesses.

# List of assumptions and modelling of the policy scenario

LCA impacts are estimated over seven years[[3]](#footnote-3) (2024-2030), right after the implementation of the mini-grid. They consider the whole lifetime and life cycle of the mini-grid. The impacts are calculated according to the consumption (not the production) from the mini-grid over a one-year period. Due to the sizing of the mini-grid and the electricity consumptions chosen, around 34% of the produced electricity is expected to not be used by customers[[4]](#footnote-4) and ends up being lost. The impacts coming from the lost energy are accounted as well as part of the consumption.

The end of life of panels and batteries is modelled according to the Ecoinvent database, which assumes batteries to be recycled.

All the components of the system are scaled to the lifetime of the mini-grid.

As no other option was available on the database, a diesel genset of 18.5 kWh was selected to represent the diesel back-up.

Finally, the environmental impacts do not take into consideration the possible increase in household’s consumption, which might result in buying more goods, and increasing waste production per capita. Based on the above-mentioned assumptions, the system modelled is summarized in Figure 3.


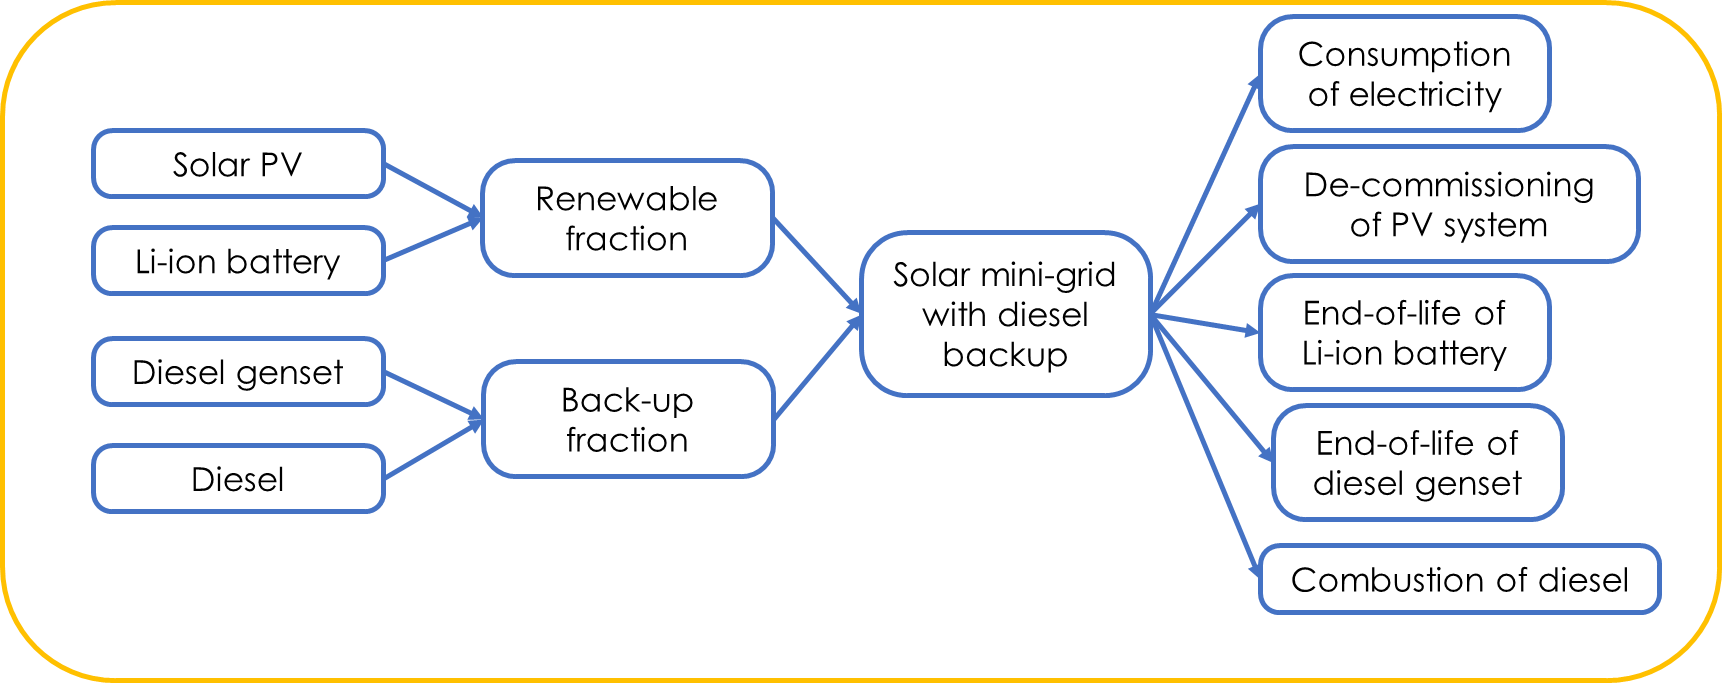


Figure 2. System boundaries of the policy scenario.

# LCA methodology and modelling

The assessment has been performed using the Ecoinvent Database (v. 8.5), in concurrence with Simapro 8 (v. 3.4), a software commonly used for LCAs. The impact assessment method ReCiPe 2016 is used to calculate characterised results. Consequential modelling is used given the big scale of changes. Since ReCiPe 2016 did not provide any normalization factors, results have been normalized using the normalisation and weighting reference of ReCiPe 2008 (World ReCiPe H/A) provided in Table 4. This could be done only at endpoint level because the midpoint impact categories in ReCiPe 2008 and 2016 differs in type and units.

Table 4. Normalisation and weighting scheme of ReCiPe 2008.

| Damage category | Normalisation | Weighting |
| --- | --- | --- |
| Human health | 73.3 | 400 |
| Ecosystems | 1090 | 400 |
| Resources | 0.00408 | 200 |

# Life Cycle Inventory

| **Process/Product** | **Quantity** | **Unit** | **Notes** |
| --- | --- | --- | --- |
| **1 kWh from PV + diesel back-up** | 1.00E+00 | kWh |  |
|  |  |  |  |
| **Inputs** |  |  |  |
| Solar installations for 31800 costumers | 3.38E-09 | p | (90%)/(n of mini grids*yearly demand*lifetime) |
| Diesel, burned in diesel-electric generating set, 18.5kW {GLO}| market for | Conseq, U | 1.00E-01 | kWh |  |
|  |  |  |  |
| **Process/Product** | **Quantity** | **Unit** | **Notes** |
| **Solar PV mini-grids for 31800 costumers - over 1 year** | 1.00E+00 | p |  |
|  |  |  |  |
| **Inputs** |  |  |  |
| 1 kWh from PV + diesel back-up | 1.07E+07 | kWh | 200 kWh/day/system * n * 365 |
|  |  |  |  |
| **Process/Product** | **Quantity** | **Unit** | **Notes** |
| **Solar installations for 31800 costumers** | 1.00E+00 | p |  |
|  |  |  |  |
| **Inputs** |  |  |  |
| Photovoltaic flat-roof installation, 3kWp, single-Si, on roof {GLO}| market for | Conseq, U | 2.92E+03 | p |  |
| Battery, Li-ion, rechargeable, prismatic {GLO} - no cobalt | market for | Conseq, U | 1.60E+05 | kg | 25 years plant/20 years life battery *48 V (tender) * 3200 Ah (wind) * n / 175 Wh/kg |
|  |  |  |  |
| **Process/Product** | **Quantity** | **Unit** | **Notes** |
| **Photovoltaic flat-roof installation, 3kWp, single-Si, on roof {GLO}| market for | Conseq, U** | 1.00E+00 | p |  |
|  |  |  |  |
| **Inputs** |  |  |  |
| Photovoltaic flat-roof installation, 3kWp, single-Si, on roof {CH}| photovoltaic flat-roof installation, 3kWp, single-Si, on roof | Conseq, U | 2.71E-03 | p |  |
| Photovoltaic flat-roof installation, 3kWp, single-Si, on roof {RoW}| photovoltaic flat-roof installation, 3kWp, single-Si, on roof | Conseq, U | 9.97E-01 | p |  |
|  |  |  |  |
|  |  |  |  |
| **Process/Product** | **Quantity** | **Unit** | **Notes** |
| **Photovoltaic flat-roof installation, 3kWp, single-Si, on roof {RoW}| photovoltaic flat-roof installation, 3kWp, single-Si, on roof | Conseq, U** | 1.00E+00 | p |  |
|  |  |  |  |
| **Inputs** |  |  |  |
| Electricity, low voltage {AU}| market for | Conseq, U | 7.64E-03 | kWh |  |
| Electricity, low voltage {Europe without Switzerland}| market group for | Conseq, U | 6.39E-02 | kWh |  |
| Electricity, low voltage {NZ}| market for electricity, low voltage | Conseq, U | 1.92E-03 | kWh |  |
| Electricity, low voltage {RAF}| market group for | Conseq, U | 2.59E-02 | kWh |  |
| Electricity, low voltage {RAS}| market group for | Conseq, U | 4.60E-01 | kWh |  |
| Electricity, low voltage {RLA}| market group for | Conseq, U | 5.41E-02 | kWh |  |
| Electricity, low voltage {RNA}| market group for | Conseq, U | 5.26E-02 | kWh |  |
| Electricity, low voltage {RoW}| market for | Conseq, U | 3.44E-01 | kWh |  |
| Electricity, low voltage {RU}| market for | Conseq, U | 9.40E-03 | kWh |  |
| Inverter, 2.5kW {GLO}| market for | Conseq, U | 2.40E+00 | p |  |
| Photovoltaic mounting system, for flat-roof installation {GLO}| market for | Conseq, U | 2.14E+01 | m2 |  |
| Photovoltaic panel, single-Si wafer {GLO}| market for | Conseq, U | 2.21E+01 | m2 |  |
| Photovoltaic plant, electric installation for 3kWp module {GLO}| market for photovoltaics, electric installation for 3kWp module, at building | Conseq, U | 1.00E+00 | p |  |
|  |  |  |  |
| **Process/Product** | **Quantity** | **Unit** | **Notes** |
| **Battery, Li-ion, rechargeable, prismatic {GLO} - no cobalt | market for | Conseq, U** | 1.00E+00 | kg |  |
|  |  |  |  |
| **Inputs** |  |  |  |
| Battery, Li-ion, rechargeable, prismatic {GLO}| production - no cobalt | Conseq, U | 1.00E+00 | kg |  |
| Transport, freight train {GLO}| market group for | Conseq, U | 1.53E-02 | tkm |  |
| Transport, freight, light commercial vehicle {GLO}| market for | Conseq, U | 9.60E-03 | tkm |  |
| Transport, freight, lorry, unspecified {GLO}| market for | Conseq, U | 3.10E-01 | tkm |  |
| Transport, freight, sea, transoceanic ship {GLO}| market for | Conseq, U | 7.37E-01 | tkm |  |
|  |  |  |  |
| **Process/Product** | **Quantity** | **Unit** | **Notes** |
| **Battery, Li-ion, rechargeable, prismatic {GLO}| production - no cobalt | Conseq, U** | 1.00E+00 | kg |  |
|  |  |  |  |
| **Inputs** |  |  |  |
| Battery cell, Li-ion {GLO} - no cobalt | market for | Conseq, U | 7.99E-01 | kg |  |
| Cable, data cable in infrastructure {GLO}| market for | Conseq, U | 3.73E-01 | m |  |
| Cable, three-conductor cable {GLO}| market for | Conseq, U | 2.50E-02 | m |  |
| Electricity, low voltage {GLO}| market group for | Conseq, U | 1.08E-01 | kWh |  |
| Metal working factory {GLO}| market for | Conseq, U | 4.58E-10 | p |  |
| Printed wiring board, surface mounted, unspecified, Pb containing {GLO}| market for | Conseq, U | 1.02E-03 | kg |  |
| Printed wiring board, surface mounted, unspecified, Pb free {GLO}| market for | Conseq, U | 2.37E-03 | kg |  |
| Reinforcing steel {GLO}| market for | Conseq, U | 1.45E-01 | kg |  |
| Sheet rolling, steel {GLO}| market for | Conseq, U | 1.45E-01 | kg |  |
|  |  |  |  |
| **Waste to treatment** |  |  |  |
| Used Li-ion battery {GLO}| market for - no cobalt | Conseq, U | 1.00E+00 | kg |  |
|  |  |  |  |
| **Process/Product** | **Quantity** | **Unit** | **Notes** |
| **Diesel, burned in diesel-electric generating set, 18.5kW {GLO}| diesel, burned in diesel-electric generating set, 18.5kW | Conseq, U** | 1.00E+00 | MJ |  |
|  |  |  |  |
| **Inputs** |  |  |  |
| Diesel {GLO}| market group for | Conseq, U | 6.67E-02 | kg |  |
| Diesel-electric generating set, 18.5kW {GLO}| market for | Conseq, U | 1.17E-06 | p |  |
| Lubricating oil {GLO}| market for | Conseq, U | 1.91E-04 | kg |  |
|  |  |  |  |
| **Emissions to air** |  |  |  |
| Benzene | 5.70E-08 | kg | low. pop. |
| Benzo(a)pyrene | 2.85E-10 | kg | low. pop. |
| Cadmium | 6.67E-10 | kg | low. pop. |
| Carbon dioxide, fossil | 2.08E-01 | kg | low. pop. |
| Carbon monoxide, fossil | 1.94E-03 | kg | low. pop. |
| Chromium | 3.33E-09 | kg | low. pop. |
| Chromium VI | 6.67E-12 | kg | low. pop. |
| Copper | 1.13E-07 | kg | low. pop. |
| Dinitrogen monoxide | 1.71E-05 | kg | low. pop. |
| Mercury | 1.33E-09 | kg | low. pop. |
| Methane, fossil | 4.76E-07 | kg | low. pop. |
| Nickel | 4.67E-09 | kg | low. pop. |
| Nitrogen oxides | 3.93E-03 | kg | low. pop. |
| NMVOC, non-methane volatile organic compounds, unspecified origin | 2.63E-04 | kg | low. pop. |
| Particulates, < 2.5 um | 4.84E-04 | kg | low. pop. |
| Selenium | 6.67E-10 | kg | low. pop. |
| Sulfur dioxide | 1.71E-04 | kg | low. pop. |
| Zinc | 6.67E-08 | kg | low. pop. |
|  |  |  |  |
| **Waste to treatment** |  |  |  |
| Waste mineral oil {CH}| market for waste mineral oil | Conseq, U | 8.06E-07 | kg |  |
| Waste mineral oil {Europe without Switzerland}| market for waste mineral oil | Conseq, U | 3.48E-05 | kg |  |
| Waste mineral oil {RoW}| market for waste mineral oil | Conseq, U | 1.55E-04 | kg |  |
|  |  |  |  |
| **Process/Product** | **Quantity** | **Unit** | **Notes** |
| **No electricity for 31800 costumers - over 1 year** | 1.00E+00 | p |  |
|  |  |  |  |
| **Inputs** |  |  |  |
| Kerosene with use | 1.37E+06 | kg |  |
| Battery cell, Li-ion {GLO} - no cobalt | market for | Conseq, U | 2.78E+04 | kg |  |
| Diesel, burned in diesel-electric generating set, 18.5kW {GLO}| market for | Conseq, U | 1.29E+06 | kWh |  |
| SHS | 1.00E+03 | p |  |
|  |  |  |  |
| **Process/Product** | **Quantity** | **Unit** | **Notes** |
| **Kerosene with use** | 1.00E+00 | kg |  |
|  |  |  |  |
| **Inputs** |  |  |  |
| Materials/fuels |  |  |  |
| Kerosene {RoW}| market for | Conseq, U | 1.00E+00 | kg |  |
| Kerosene with use | 0.00E+00 | kg |  |
|  |  |  |  |
| **Emissions to air** |  |  |  |
| Carbon dioxide | 3.19E+00 | kg | indoor |
| Carbon monoxide | 1.10E+01 | g | indoor |
| Organic carbon | 4.00E-01 | g | indoor |
| Particulates, < 2.5 um | 9.30E+01 | g | indoor |
|  |  |  |  |
| **Process/Product** | **Quantity** | **Unit** | **Notes** |
| **SHS** | 1.00E+00 | p |  |
|  |  |  |  |
| **Inputs** |  |  |  |
| Photovoltaic slanted-roof installation, 3kWp, single-Si, laminated, integrated, on roof {GLO}| market for | Conseq, U | 6.67E-03 | p |  |
| Battery, Li-ion, rechargeable, prismatic {GLO} - no cobalt | market for | Conseq, U | 1.26E-01 | kg |  |
|  |  |  |  |
| **Process/Product** | **Quantity** | **Unit** | **Notes** |
| **Battery cell, Li-ion {GLO} - no cobalt | market for | Conseq, U** | 1.00E+00 | kg |  |
|  |  |  |  |
| **Inputs** |  |  |  |
| Battery cell, Li-ion {CN}| production | Conseq, U | 4.94E-02 | kg |  |
| Battery cell, Li-ion {RoW}| production - no cobalt | Conseq, U | 9.51E-01 | kg |  |
| Transport, freight train {GLO}| market group for | Conseq, U | 2.00E-02 | tkm |  |
| Transport, freight, lorry, unspecified {GLO}| market for | Conseq, U | 2.00E-02 | tkm |  |
|  |  |  |  |
| **Process/Product** | **Quantity** | **Unit** | **Notes** |
| **Battery cell, Li-ion {RoW}| production - no cobalt | Conseq, U** | 1.00E+00 | kg |  |
|  |  |  |  |
| **Inputs** |  |  |  |
| Aluminium, wrought alloy {GLO}| market for | Conseq, U | 1.65E-02 | kg |  |
| Anode, graphite, for lithium-ion battery {GLO}| market for | Conseq, U | 4.01E-01 | kg |  |
| Battery separator {GLO}| market for | Conseq, U | 5.37E-02 | kg |  |
| Cathode, LiMn2O4, for lithium-ion battery {GLO}| market for | Conseq, U | 3.27E-01 | kg |  |
| Chemical factory, organics {GLO}| market for | Conseq, U | 4.00E-10 | p |  |
| Electricity, medium voltage {AU}| market for | Conseq, U | 2.22E-04 | kWh |  |
| Electricity, medium voltage {NZ}| market for electricity, medium voltage | Conseq, U | 2.23E-04 | kWh |  |
| Electricity, medium voltage {RAF}| market group for | Conseq, U | 2.84E-03 | kWh |  |
| Electricity, medium voltage {RAS}| market group for | Conseq, U | 4.93E-02 | kWh |  |
| Electricity, medium voltage {RER}| market group for | Conseq, U | 6.10E-03 | kWh |  |
| Electricity, medium voltage {RLA}| market group for | Conseq, U | 6.00E-03 | kWh |  |
| Electricity, medium voltage {RNA}| market group for | Conseq, U | 4.24E-03 | kWh |  |
| Electricity, medium voltage {RoW}| market for | Conseq, U | 3.56E-02 | kWh |  |
| Electricity, medium voltage {RU}| market for | Conseq, U | 1.11E-03 | kWh |  |
| Ethylene carbonate {GLO}| market for | Conseq, U | 1.60E-01 | kg |  |
| Extrusion, plastic film {GLO}| market for | Conseq, U | 7.33E-02 | kg |  |
| Heat, district or industrial, natural gas {CA-QC}| market for | Conseq, U | 1.72E-02 | MJ |  |
| Heat, district or industrial, natural gas {RER}| market group for | Conseq, U | 4.80E-02 | MJ |  |
| Lithium hexafluorophosphate {GLO}| market for | Conseq, U | 1.90E-02 | kg |  |
| Nitrogen, liquid {RER}| market for | Conseq, U | 1.00E-02 | kg |  |
| Polyethylene, low density, granulate {GLO}| market for | Conseq, U | 7.33E-02 | kg |  |
| Sheet rolling, aluminium {GLO}| market for | Conseq, U | 1.65E-02 | kg |  |
|  |  |  |  |
| **Waste to treatment** |  |  |  |
| Used Li-ion battery {GLO}| market for - no cobalt | Conseq, U | 5.25E-02 | kg |  |
|  |  |  |  |
| **Process/Product** | **Quantity** | **Unit** | **Notes** |
| **Used Li-ion battery {GLO}| market for - no cobalt | Conseq, U** | 1.00E+00 | kg |  |
|  |  |  |  |
| **Inputs** |  |  |  |
| Transport, freight train {GLO}| market group for | Conseq, U | 1.12E-01 | tkm |  |
| Transport, freight, inland waterways, barge {GLO}| market for | Conseq, U | 1.99E-02 | tkm |  |
| Transport, freight, lorry, unspecified {GLO}| market for | Conseq, U | 1.93E-01 | tkm |  |
| Transport, freight, sea, transoceanic ship {GLO}| market for | Conseq, U | 2.12E-01 | tkm |  |
|  |  |  |  |
| **Waste to treatment** |  |  |  |
| Used Li-ion battery {GLO}| treatment of used Li-ion battery, hydrometallurgical treatment - no cobalt | Conseq, U | 5.00E-01 | kg |  |
| Used Li-ion battery {GLO}| treatment of used Li-ion battery, pyrometallurgical treatment - no cobalt | Conseq, U | 5.00E-01 | kg |  |
|  |  |  |  |
| **Process/Product** | **Quantity** | **Unit** | **Notes** |
| **Used Li-ion battery {GLO}| treatment of used Li-ion battery, hydrometallurgical treatment - no cobalt | Conseq, U** | 1.00E+00 | kg |  |
|  |  |  |  |
| **Inputs** |  |  |  |
| Water, unspecified natural origin, GLO | 7.20E-04 | m3 | in water |
| Chemical factory, organics {GLO}| market for | Conseq, U | 4.00E-10 | p |  |
| Chemical, inorganic {GLO}| market for chemicals, inorganic | Conseq, U | 2.50E-02 | kg |  |
| Cobalt {GLO}| market for | Conseq, U | 0.00E+00 | kg |  |
| Electricity, medium voltage {GLO}| market group for | Conseq, U | 1.40E-01 | kWh |  |
| Iron scrap, unsorted {GLO}| market for | Conseq, U | -1.65E-01 | kg |  |
| Lime, hydrated, packed {GLO}| market for | Conseq, U | 1.16E-01 | kg |  |
| Lithium carbonate {GLO}| market for | Conseq, U | -1.98E-01 | kg |  |
| Sulfuric acid {GLO}| market for | Conseq, U | 2.31E-01 | kg |  |
|  |  |  |  |
| **Emissions to air** |  |  |  |
| NMVOC, non-methane volatile organic compounds, unspecified origin | 2.50E-06 | kg | high. pop. |
| Sulfur dioxide | 4.50E-06 | kg | high. pop. |
| Water/m3 | 1.08E-04 | m3 |  |
| **Emissions to water** |  |  |  |
| BOD5, Biological Oxygen Demand | 6.00E-05 | kg | river |
| Cobalt | 1.70E-08 | kg | river |
| COD, Chemical Oxygen Demand | 3.00E-05 | kg | river |
| Copper | 1.65E-08 | kg | river |
| DOC, Dissolved Organic Carbon | 1.11E-05 | kg | river |
| Fluoride | 3.00E-08 | kg | river |
| Hydrocarbons, unspecified | 1.00E-08 | kg | river |
| Nickel | 1.65E-08 | kg | river |
| Suspended solids, unspecified | 1.20E-05 | kg | river |
| TOC, Total Organic Carbon | 1.11E-05 | kg | river |
| Water, GLO | 6.12E-04 | m3 |  |
|  |  |  |  |
| **Waste to treatment** |  |  |  |
| Inert waste, for final disposal {CH}| market for inert waste, for final disposal | Conseq, U | 1.31E-03 | kg |  |
| Inert waste, for final disposal {RoW}| market for inert waste, for final disposal | Conseq, U | 2.01E-01 | kg |  |
| Non-Fe-Co-metals, from Li-ion battery, hydrometallurgical processing {GLO}| market for | Conseq, U | 1.50E-01 | kg |  |
| Waste graphical paper {CH}| market for waste graphical paper | Conseq, U | 3.23E-04 | kg |  |
| Waste graphical paper {Europe without Switzerland}| market for waste graphical paper | Conseq, U | 1.22E-02 | kg |  |
| Waste graphical paper {RoW}| market for waste graphical paper | Conseq, U | 5.24E-02 | kg |  |
| Waste gypsum {CH}| market for waste gypsum | Conseq, U | 3.72E-03 | kg |  |
| Waste gypsum {Europe without Switzerland}| market for waste gypsum | Conseq, U | 7.88E-02 | kg |  |
| Waste gypsum {RoW}| market for waste gypsum | Conseq, U | 2.56E-01 | kg |  |
| Waste plastic, mixture {CH}| market for waste plastic, mixture | Conseq, U | 3.48E-04 | kg |  |
| Waste plastic, mixture {Europe without Switzerland}| market for waste plastic, mixture | Conseq, U | 5.35E-03 | kg |  |
| Waste plastic, mixture {RoW}| market for waste plastic, mixture | Conseq, U | 5.93E-02 | kg |  |
|  |  |  |  |
| **Process/Product** | **Quantity** | **Unit** | **Notes** |
| **Used Li-ion battery {GLO}| treatment of used Li-ion battery, pyrometallurgical treatment - no cobalt | Conseq, U** | 1.00E+00 | kg |  |
|  |  |  |  |
| **Inputs** |  |  |  |
| Water, unspecified natural origin, GLO | 1.00E-03 | m3 | in water |
| Blister-copper conversion facility {GLO}| market for | Conseq, U | 5.00E-10 | p |  |
| Cobalt {GLO}| market for | Conseq, U | 0.00E+00 | kg |  |
| Electricity, medium voltage {GLO}| market group for | Conseq, U | 8.00E-01 | kWh |  |
| Iron scrap, unsorted {GLO}| market for | Conseq, U | -2.70E-01 | kg |  |
| Manganese dioxide {GLO}| market for | Conseq, U | -1.00E-02 | kg |  |
| Sodium hydroxide, without water, in 50% solution state {GLO}| market for | Conseq, U | 3.50E-01 | kg |  |
|  |  |  |  |
| **Emissions to air** |  |  |  |
| Particulates, < 2.5 um | 1.04E-04 | kg | high. pop. |
| Particulates, > 10 um | 1.04E-05 | kg | high. pop. |
| Particulates, > 2.5 um, and < 10um | 9.36E-05 | kg | high. pop. |
| Sulfur dioxide | 4.80E-05 | kg | high. pop. |
| Water/m3 | 1.50E-04 | m3 |  |
| Emissions to water |  |  |  |
| Chloride | 4.00E-02 | kg | river |
| Sulfate | 6.00E-02 | kg | river |
| Water, GLO | 8.50E-04 | m3 |  |
|  |  |  |  |
| **Waste to treatment** |  |  |  |
| Non-Fe-Co-metals, from used Li-ion battery, pyrometallurgical processing {GLO}| market for | Conseq, U | 2.40E-01 | kg |  |
| Waste plastic, mixture {CH}| market for waste plastic, mixture | Conseq, U | 1.07E-03 | kg |  |
| Waste plastic, mixture {Europe without Switzerland}| market for waste plastic, mixture | Conseq, U | 1.65E-02 | kg |  |
| Waste plastic, mixture {RoW}| market for waste plastic, mixture | Conseq, U | 1.82E-01 | kg |  |
|  |  |  |  |
| **Process/Product** | **Quantity** | **Unit** | **Notes** |
| **Photovoltaic panel, single-Si wafer {GLO}| market for | Conseq, U** | 1.00E+00 | m2 |  |
|  |  |  |  |
| **Inputs** |  |  |  |
| Photovoltaic panel, single-Si wafer {RER}| production | Conseq, U | 3.60E-01 | m2 |  |
| Photovoltaic panel, single-Si wafer {RoW}| production | Conseq, U | 6.40E-01 | m2 |  |
|  |  |  |  |
| **Process/Product** | **Quantity** | **Unit** | **Notes** |
| **Photovoltaic panel, single-Si wafer {RER}| production | Conseq, U** | 1.00E+00 | m2 |  |
|  |  |  |  |
| **Inputs** |  |  |  |
| 1-propanol {GLO}| market for | Conseq, U | 8.14E-03 | kg |  |
| Acetone, liquid {GLO}| market for | Conseq, U | 1.30E-02 | kg |  |
| Aluminium alloy, AlMg3 {GLO}| market for | Conseq, U | 2.63E+00 | kg |  |
| Brazing solder, cadmium free {GLO}| market for | Conseq, U | 8.76E-03 | kg |  |
| Copper {GLO}| market for | Conseq, U | 1.13E-01 | kg |  |
| Corrugated board box {GLO}| market for corrugated board box | Conseq, U | 1.10E+00 | kg |  |
| Electricity, medium voltage {RER}| market group for | Conseq, U | 4.71E+00 | kWh |  |
| Ethylvinylacetate, foil {GLO}| market for | Conseq, U | 1.00E+00 | kg |  |
| Glass fibre reinforced plastic, polyamide, injection moulded {GLO}| market for | Conseq, U | 1.88E-01 | kg |  |
| Heat, district or industrial, natural gas {RER}| market group for | Conseq, U | 4.87E+00 | MJ |  |
| Lubricating oil {GLO}| market for | Conseq, U | 1.61E-03 | kg |  |
| Methanol {GLO}| market for | Conseq, U | 2.16E-03 | kg |  |
| Nickel, 99.5% {GLO}| market for | Conseq, U | 1.63E-04 | kg |  |
| Photovoltaic cell, single-Si wafer {GLO}| market for | Conseq, U | 9.32E-01 | m2 |  |
| Photovoltaic panel factory {GLO}| market for | Conseq, U | 4.00E-06 | p |  |
| Polyethylene terephthalate, granulate, amorphous {GLO}| market for | Conseq, U | 3.73E-01 | kg |  |
| Polyvinylfluoride, film {GLO}| market for | Conseq, U | 1.10E-01 | kg |  |
| Silicone product {GLO}| market for | Conseq, U | 1.22E-01 | kg |  |
| Solar glass, low-iron {GLO}| market for | Conseq, U | 1.01E+01 | kg |  |
| Tap water {RER}| market group for | Conseq, U | 2.13E+01 | kg |  |
| Tempering, flat glass {GLO}| market for | Conseq, U | 1.01E+01 | kg |  |
| Vinyl acetate {GLO}| market for | Conseq, U | 1.64E-03 | kg |  |
| Wire drawing, copper {GLO}| market for | Conseq, U | 1.13E-01 | kg |  |
|  |  |  |  |
| **Emissions to air** |  |  |  |
| Water/m3 | 3.19E-03 | m3 |  |
|  |  |  |  |
| **Waste to treatment** |  |  |  |
| Municipal solid waste {CH}| market for | Conseq, U | 3.00E-02 | kg |  |
| Waste mineral oil {CH}| market for waste mineral oil | Conseq, U | 3.63E-05 | kg |  |
| Waste mineral oil {Europe without Switzerland}| market for waste mineral oil | Conseq, U | 1.57E-03 | kg |  |
| Waste plastic, mixture {CH}| market for waste plastic, mixture | Conseq, U | 1.03E-01 | kg |  |
| Waste plastic, mixture {Europe without Switzerland}| market for waste plastic, mixture | Conseq, U | 1.58E+00 | kg |  |
| Waste polyvinylfluoride {GLO}| market for | Conseq, U | 1.10E-01 | kg |  |
| Wastewater, from residence {RoW}| market for wastewater, from residence | Conseq, U | 2.13E-02 | m3 |  |
|  |  |  |  |
| **Process/Product** | **Quantity** | **Unit** | **Notes** |
| **Photovoltaic panel, single-Si wafer {RoW}| production | Conseq, U** | 1.00E+00 | m2 |  |
|  |  |  |  |
|  |  |  |  |
| **Inputs** |  |  |  |
| 1-propanol {GLO}| market for | Conseq, U | 8.14E-03 | kg |  |
| Acetone, liquid {GLO}| market for | Conseq, U | 1.30E-02 | kg |  |
| Aluminium alloy, AlMg3 {GLO}| market for | Conseq, U | 2.63E+00 | kg |  |
| Brazing solder, cadmium free {GLO}| market for | Conseq, U | 8.76E-03 | kg |  |
| Copper {GLO}| market for | Conseq, U | 1.13E-01 | kg |  |
| Corrugated board box {GLO}| market for corrugated board box | Conseq, U | 1.10E+00 | kg |  |
| Electricity, medium voltage {AU}| market for | Conseq, U | 1.05E-02 | kWh |  |
| Electricity, medium voltage {NZ}| market for electricity, medium voltage | Conseq, U | 1.06E-02 | kWh |  |
| Electricity, medium voltage {RAF}| market group for | Conseq, U | 1.35E-01 | kWh |  |
| Electricity, medium voltage {RAS}| market group for | Conseq, U | 2.33E+00 | kWh |  |
| Electricity, medium voltage {RLA}| market group for | Conseq, U | 2.84E-01 | kWh |  |
| Electricity, medium voltage {RNA}| market group for | Conseq, U | 2.01E-01 | kWh |  |
| Electricity, medium voltage {RoW}| market for | Conseq, U | 1.69E+00 | kWh |  |
| Electricity, medium voltage {RU}| market for | Conseq, U | 5.24E-02 | kWh |  |
| Ethylvinylacetate, foil {GLO}| market for | Conseq, U | 1.00E+00 | kg |  |
| Glass fibre reinforced plastic, polyamide, injection moulded {GLO}| market for | Conseq, U | 1.88E-01 | kg |  |
| Heat, district or industrial, natural gas {CA-QC}| market for | Conseq, U | 6.52E-01 | MJ |  |
| Heat, district or industrial, natural gas {RoW}| market for heat, district or industrial, natural gas | Conseq, U | 4.21E+00 | MJ |  |
| Lubricating oil {GLO}| market for | Conseq, U | 1.61E-03 | kg |  |
| Methanol {GLO}| market for | Conseq, U | 2.16E-03 | kg |  |
| Nickel, 99.5% {GLO}| market for | Conseq, U | 1.63E-04 | kg |  |
| Photovoltaic cell, single-Si wafer {GLO}| market for | Conseq, U | 9.32E-01 | m2 |  |
| Photovoltaic panel factory {GLO}| market for | Conseq, U | 4.00E-06 | p |  |
| Polyethylene terephthalate, granulate, amorphous {GLO}| market for | Conseq, U | 3.73E-01 | kg |  |
| Polyvinylfluoride, film {GLO}| market for | Conseq, U | 1.10E-01 | kg |  |
| Silicone product {GLO}| market for | Conseq, U | 1.22E-01 | kg |  |
| Solar glass, low-iron {GLO}| market for | Conseq, U | 1.01E+01 | kg |  |
| Tap water {CA-QC}| market for | Conseq, U | 4.93E-02 | kg |  |
| Tap water {RoW}| market for | Conseq, U | 2.12E+01 | kg |  |
| Tempering, flat glass {GLO}| market for | Conseq, U | 1.01E+01 | kg |  |
| Vinyl acetate {GLO}| market for | Conseq, U | 1.64E-03 | kg |  |
| Wire drawing, copper {GLO}| market for | Conseq, U | 1.13E-01 | kg |  |
|  |  |  |  |
| **Emissions to air** |  |  |  |
| Water/m3 | 3.19E-03 | m3 |  |
|  |  |  |  |
| **Waste to treatment** |  |  |  |
| Municipal solid waste {CA-QC}| market for | Conseq, U | 6.72E-05 | kg |  |
| Municipal solid waste {RoW}| market for | Conseq, U | 2.99E-02 | kg |  |
| Waste mineral oil {RoW}| market for waste mineral oil | Conseq, U | 1.61E-03 | kg |  |
| Waste plastic, mixture {RoW}| market for waste plastic, mixture | Conseq, U | 1.69E+00 | kg |  |
| Waste polyvinylfluoride {GLO}| market for | Conseq, U | 1.10E-01 | kg |  |
| Wastewater, from residence {RoW}| market for wastewater, from residence | Conseq, U | 2.13E-02 | m3 |  |
|  |  |  |  |
| **Process/Product** | **Quantity** | **Unit** | **Notes** |
| **Photovoltaic mounting system, for flat-roof installation {GLO}| market for | Conseq, U** | 1.00E+00 | m2 |  |
|  |  |  |  |
| **Inputs** |  |  |  |
| Photovoltaic mounting system, for flat-roof installation {RER}| production | Conseq, U | 8.77E-04 | m2 |  |
| Photovoltaic mounting system, for flat-roof installation {RoW}| production | Conseq, U | 9.99E-01 | m2 |  |
|  |  |  |  |
| **Process/Product** | **Quantity** | **Unit** | **Notes** |
| **Photovoltaic mounting system, for flat-roof installation {RoW}| production | Conseq, U** | 1.00E+00 | m2 |  |
|  |  |  |  |
| **Inputs** |  |  |  |
| Aluminium, wrought alloy {GLO}| market for | Conseq, U | 2.52E+00 | kg |  |
| Corrugated board box {GLO}| market for corrugated board box | Conseq, U | 1.83E-02 | kg |  |
| Polyethylene, high density, granulate {GLO}| market for | Conseq, U | 1.92E+00 | kg |  |
| Polystyrene, high impact {GLO}| market for | Conseq, U | 8.30E-03 | kg |  |
| Section bar extrusion, aluminium {GLO}| market for | Conseq, U | 2.52E+00 | kg |  |
| Sheet rolling, steel {GLO}| market for | Conseq, U | 2.67E-01 | kg |  |
| Steel, low-alloyed, hot rolled {GLO}| market for | Conseq, U | 2.67E-01 | kg |  |
|  |  |  |  |
| **Waste to treatment** |  |  |  |
| Scrap aluminium {CH}| market for scrap aluminium | Conseq, U | 3.75E-02 | kg |  |
| Scrap aluminium {Europe without Switzerland}| market for scrap aluminium | Conseq, U | 7.99E-01 | kg |  |
| Scrap aluminium {RoW}| market for scrap aluminium | Conseq, U | 1.68E+00 | kg |  |
| Scrap steel {CH}| market for scrap steel | Conseq, U | 1.09E-04 | kg |  |
| Scrap steel {Europe without Switzerland}| market for scrap steel | Conseq, U | 8.63E-02 | kg |  |
| Scrap steel {RoW}| market for scrap steel | Conseq, U | 1.80E-01 | kg |  |
| Waste paperboard {RoW}| market for waste paperboard | Conseq, U | 1.83E-02 | kg |  |
| Waste polyethylene/polypropylene product {RoW}| market for waste polyethylene/polypropylene product | Conseq, U | 1.92E+00 | kg |  |
| Waste polystyrene isolation, flame-retardant {RoW}| market for waste polystyrene isolation, flame-retardant | Conseq, U | 8.30E-03 | kg |  |
|  |  |  |  |
| **Process/Product** | **Quantity** | **Unit** | **Notes** |
| **Photovoltaic plant, electric installation for 3kWp module {GLO}| market for photovoltaics, electric installation for 3kWp module, at building | Conseq, U** | 1.00E+00 | p |  |
|  |  |  |  |
| **Inputs** |  |  |  |
| Photovoltaic plant, electric installation for 3kWp module {CH}| photovoltaics, electric installation for 3kWp module, at building | Conseq, U | 1.08E-03 | p |  |
| Photovoltaic plant, electric installation for 3kWp module {RoW}| photovoltaics, electric installation for 3kWp module, at building | Conseq, U | 9.99E-01 | p |  |
|  |  |  |  |
| **Process/Product** | **Quantity** | **Unit** | **Notes** |
| **Photovoltaic plant, electric installation for 3kWp module {RoW}| photovoltaics, electric installation for 3kWp module, at building | Conseq, U** | 1.00E+00 | p |  |
|  |  |  |  |
| **Inputs** |  |  |  |
| Brass {RoW}| market for brass | Conseq, U | 2.00E-02 | kg |  |
| Copper {GLO}| market for | Conseq, U | 1.47E+01 | kg |  |
| Epoxy resin, liquid {GLO}| market for | Conseq, U | 2.00E-03 | kg |  |
| Nylon 6 {GLO}| market for | Conseq, U | 2.30E-01 | kg |  |
| Polycarbonate {GLO}| market for | Conseq, U | 2.00E-01 | kg |  |
| Polyethylene, high density, granulate {GLO}| market for | Conseq, U | 1.44E+01 | kg |  |
| Polyvinylchloride, bulk polymerised {GLO}| market for | Conseq, U | 2.13E+00 | kg |  |
| Steel, low-alloyed, hot rolled {GLO}| market for | Conseq, U | 8.60E-01 | kg |  |
| Wire drawing, copper {GLO}| market for | Conseq, U | 1.47E+01 | kg |  |
| Zinc {GLO}| market for | Conseq, U | 4.00E-02 | kg |  |
|  |  |  |  |
| **Waste to treatment** |  |  |  |
| Scrap copper {Europe without Switzerland}| market for scrap copper | Conseq, U | 6.44E-03 | kg |  |
| Scrap copper {RoW}| market for scrap copper | Conseq, U | 1.36E-02 | kg |  |
| Scrap steel {Europe without Switzerland}| market for scrap steel | Conseq, U | 2.91E-01 | kg |  |
| Scrap steel {RoW}| market for scrap steel | Conseq, U | 6.09E-01 | kg |  |
| Waste electric wiring {GLO}| market for | Conseq, U | 2.93E+01 | kg |  |
| Waste polyethylene/polypropylene product {Europe without Switzerland}| market for waste polyethylene/polypropylene product | Conseq, U | 5.71E-02 | kg |  |
| Waste polyethylene/polypropylene product {RoW}| market for waste polyethylene/polypropylene product | Conseq, U | 1.45E-01 | kg |  |
| Waste polyvinylchloride {Europe without Switzerland}| market for waste polyvinylchloride | Conseq, U | 1.43E-01 | kg |  |
| Waste polyvinylchloride {RoW}| market for waste polyvinylchloride | Conseq, U | 1.99E+00 | kg |  |
|  |  |  |  |
| **Process/Product** | **Quantity** | **Unit** | **Notes** |
| **Inverter, 2.5kW {GLO}| market for | Conseq, U** | 1.00E+00 | p |  |
|  |  |  |  |
| **Inputs** |  |  |  |
| Inverter, 2.5kW {RER}| production | Conseq, U | 3.31E-01 | p |  |
| Inverter, 2.5kW {RoW}| production | Conseq, U | 6.69E-01 | p |  |
|  |  |  |  |
| **Process/Product** | **Quantity** | **Unit** | **Notes** |
| **Inverter, 2.5kW {RER}| production | Conseq, U** | 1.00E+00 | p |  |
|  |  |  |  |
| **Inputs** |  |  |  |
| Aluminium, cast alloy {GLO}| market for | Conseq, U | 1.40E+00 | kg |  |
| Capacitor, electrolyte type, > 2cm height {GLO}| market for | Conseq, U | 2.56E-01 | kg |  |
| Capacitor, film type, for through-hole mounting {GLO}| market for | Conseq, U | 3.41E-01 | kg |  |
| Capacitor, tantalum-, for through-hole mounting {GLO}| market for | Conseq, U | 2.30E-02 | kg |  |
| Copper {GLO}| market for | Conseq, U | 5.51E+00 | kg |  |
| Corrugated board box {GLO}| market for corrugated board box | Conseq, U | 2.50E+00 | kg |  |
| Diode, glass-, for through-hole mounting {GLO}| market for | Conseq, U | 4.70E-02 | kg |  |
| Electric connector, wire clamp {GLO}| market for | Conseq, U | 2.37E-01 | kg |  |
| Electricity, medium voltage {RER}| market group for | Conseq, U | 2.12E+01 | kWh |  |
| Fleece, polyethylene {GLO}| market for | Conseq, U | 6.00E-02 | kg |  |
| Inductor, ring core choke type {GLO}| market for | Conseq, U | 3.51E-01 | kg |  |
| Integrated circuit, logic type {GLO}| market for | Conseq, U | 2.80E-02 | kg |  |
| Metal working factory {GLO}| market for | Conseq, U | 8.97E-09 | p |  |
| Polystyrene foam slab {GLO}| market for | Conseq, U | 3.00E-01 | kg |  |
| Polyvinylchloride, suspension polymerised {GLO}| market for | Conseq, U | 1.11E-03 | kg |  |
| Printed wiring board, for through-hole mounting, Pb containing surface {GLO}| market for | Conseq, U | 1.12E-01 | m2 |  |
| Printed wiring board, for through-hole mounting, Pb free surface {GLO}| market for | Conseq, U | 1.12E-01 | m2 |  |
| Resistor, metal film type, through-hole mounting {GLO}| market for | Conseq, U | 5.00E-03 | kg |  |
| Section bar extrusion, aluminium {GLO}| market for | Conseq, U | 1.40E+00 | kg |  |
| Sheet rolling, steel {GLO}| market for | Conseq, U | 9.80E+00 | kg |  |
| Steel, low-alloyed, hot rolled {GLO}| market for | Conseq, U | 9.80E+00 | kg |  |
| Styrene-acrylonitrile copolymer {GLO}| market for | Conseq, U | 1.00E-02 | kg |  |
| Transistor, wired, small size, through-hole mounting {GLO}| market for | Conseq, U | 3.80E-02 | kg |  |
| Wire drawing, copper {GLO}| market for | Conseq, U | 5.51E+00 | kg |  |
|  |  |  |  |
| **Waste to treatment** |  |  |  |
| Used printed wiring boards {GLO}| market for | Conseq, U | 1.70E+00 | kg |  |
| Waste paperboard {CH}| market for waste paperboard | Conseq, U | 3.53E-02 | kg |  |
| Waste paperboard {Europe without Switzerland}| market for waste paperboard | Conseq, U | 2.46E+00 | kg |  |
| Waste polyethylene {CH}| market for waste polyethylene | Conseq, U | 1.32E-03 | kg |  |
| Waste polyethylene {Europe without Switzerland}| market for waste polyethylene | Conseq, U | 5.87E-02 | kg |  |
| Waste polystyrene {CH}| market for waste polystyrene | Conseq, U | 6.81E-03 | kg |  |
| Waste polystyrene {Europe without Switzerland}| market for waste polystyrene | Conseq, U | 3.03E-01 | kg |  |
|  |  |  |  |
| **Process/Product** | **Quantity** | **Unit** | **Notes** |
| **Inverter, 2.5kW {RoW}| production | Conseq, U** | 1.00E+00 | p |  |
|  |  |  |  |
| **Inputs** |  |  |  |
| Aluminium, cast alloy {GLO}| market for | Conseq, U | 1.40E+00 | kg |  |
| Capacitor, electrolyte type, > 2cm height {GLO}| market for | Conseq, U | 2.56E-01 | kg |  |
| Capacitor, film type, for through-hole mounting {GLO}| market for | Conseq, U | 3.41E-01 | kg |  |
| Capacitor, tantalum-, for through-hole mounting {GLO}| market for | Conseq, U | 2.30E-02 | kg |  |
| Copper {GLO}| market for | Conseq, U | 5.51E+00 | kg |  |
| Corrugated board box {GLO}| market for corrugated board box | Conseq, U | 2.50E+00 | kg |  |
| Diode, glass-, for through-hole mounting {GLO}| market for | Conseq, U | 4.70E-02 | kg |  |
| Electric connector, wire clamp {GLO}| market for | Conseq, U | 2.37E-01 | kg |  |
| Electricity, medium voltage {AU}| market for | Conseq, U | 4.72E-02 | kWh |  |
| Electricity, medium voltage {NZ}| market for electricity, medium voltage | Conseq, U | 4.76E-02 | kWh |  |
| Electricity, medium voltage {RAF}| market group for | Conseq, U | 6.06E-01 | kWh |  |
| Electricity, medium voltage {RAS}| market group for | Conseq, U | 1.05E+01 | kWh |  |
| Electricity, medium voltage {RLA}| market group for | Conseq, U | 1.28E+00 | kWh |  |
| Electricity, medium voltage {RNA}| market group for | Conseq, U | 9.03E-01 | kWh |  |
| Electricity, medium voltage {RoW}| market for | Conseq, U | 7.59E+00 | kWh |  |
| Electricity, medium voltage {RU}| market for | Conseq, U | 2.36E-01 | kWh |  |
| Fleece, polyethylene {GLO}| market for | Conseq, U | 6.00E-02 | kg |  |
| Inductor, ring core choke type {GLO}| market for | Conseq, U | 3.51E-01 | kg |  |
| Integrated circuit, logic type {GLO}| market for | Conseq, U | 2.80E-02 | kg |  |
| Metal working factory {GLO}| market for | Conseq, U | 8.97E-09 | p |  |
| Polystyrene foam slab {GLO}| market for | Conseq, U | 3.00E-01 | kg |  |
| Polyvinylchloride, suspension polymerised {GLO}| market for | Conseq, U | 1.11E-03 | kg |  |
| Printed wiring board, for through-hole mounting, Pb containing surface {GLO}| market for | Conseq, U | 1.12E-01 | m2 |  |
| Printed wiring board, for through-hole mounting, Pb free surface {GLO}| market for | Conseq, U | 1.12E-01 | m2 |  |
| Resistor, metal film type, through-hole mounting {GLO}| market for | Conseq, U | 5.00E-03 | kg |  |
| Section bar extrusion, aluminium {GLO}| market for | Conseq, U | 1.40E+00 | kg |  |
| Sheet rolling, steel {GLO}| market for | Conseq, U | 9.80E+00 | kg |  |
| Steel, low-alloyed, hot rolled {GLO}| market for | Conseq, U | 9.80E+00 | kg |  |
| Styrene-acrylonitrile copolymer {GLO}| market for | Conseq, U | 1.00E-02 | kg |  |
| Transistor, wired, small size, through-hole mounting {GLO}| market for | Conseq, U | 3.80E-02 | kg |  |
| Wire drawing, copper {GLO}| market for | Conseq, U | 5.51E+00 | kg |  |
|  |  |  |  |
| **Waste to treatment** |  |  |  |
| Used printed wiring boards {GLO}| market for | Conseq, U | 1.70E+00 | kg |  |
| Waste paperboard {RoW}| market for waste paperboard | Conseq, U | 2.50E+00 | kg |  |
| Waste polyethylene {RoW}| market for waste polyethylene | Conseq, U | 6.00E-02 | kg |  |
| Waste polystyrene {RoW}| market for waste polystyrene | Conseq, U | 3.10E-01 | kg |  |

# Full LCA results

Table 5. Characterised midpoint results for the baseline and policy scenarios.

| **Impact category** | **Unit** | **Baseline scenario**  **(1 year)** | **Policy scenario**  **(1 year)** | **Difference**  **(1 year)** |
| --- | --- | --- | --- | --- |
| Global warming | kg CO2 eq | 6.88E+06 | 2.00E+06 | -4.88E+06 |
| Stratospheric ozone depletion | kg CFC11 eq | 2.65E+00 | 1.39E+00 | -1.27E+00 |
| Ionizing radiation | kBq Co-60 eq | -2.40E+04 | 3.21E+04 | 5.62E+04 |
| Ozone formation, Human health | kg NOx eq | 2.39E+04 | 1.82E+04 | -5.68E+03 |
| Fine particulate matter formation | kg PM2.5 eq | 1.40E+05 | 5.35E+03 | -1.34E+05 |
| Ozone formation, Terrestrial ecosystems | kg NOx eq | 2.43E+04 | 1.85E+04 | -5.81E+03 |
| Terrestrial acidification | kg SO2 eq | 2.03E+04 | 5.48E+03 | -1.48E+04 |
| Freshwater eutrophication | kg P eq | 2.36E+03 | 1.27E+03 | -1.10E+03 |
| Marine eutrophication | kg N eq | 1.44E+02 | 9.62E+01 | -4.74E+01 |
| Terrestrial ecotoxicity | kg 1,4-DCB | 2.36E+07 | 2.87E+07 | 5.14E+06 |
| Freshwater ecotoxicity | kg 1,4-DCB | 2.29E+05 | 2.87E+05 | 5.81E+04 |
| Marine ecotoxicity | kg 1,4-DCB | 3.27E+05 | 4.03E+05 | 7.64E+04 |
| Human carcinogenic toxicity | kg 1,4-DCB | 1.33E+05 | 1.04E+05 | -2.90E+04 |
| Human non-carcinogenic toxicity | kg 1,4-DCB | 7.60E+06 | 5.05E+06 | -2.54E+06 |
| Land use | m2a crop eq | 2.50E+05 | 6.61E+04 | -1.84E+05 |
| Mineral resource scarcity | kg Cu eq | 1.44E+04 | 1.48E+04 | 4.31E+02 |
| Fossil resource scarcity | kg oil eq | 2.29E+06 | 6.04E+05 | -1.68E+06 |
| Water consumption | m3 | 3.34E+04 | 2.48E+04 | -8.56E+03 |

Table 6. Characterised endpoint results for the baseline and policy scenarios.

| **Impact category** | **Unit** | **Baseline scenario**  **(1 year)** | **Policy scenario**  **(1 year)** | **Difference**  **(1 year)** |
| --- | --- | --- | --- | --- |
| Global warming, Human health | DALY | 6.38E+00 | 1.85E+00 | -4.53E+00 |
| Global warming, Terrestrial ecosystems | species.yr | 1.93E-02 | 5.60E-03 | -1.37E-02 |
| Global warming, Freshwater ecosystems | species.yr | 5.26E-07 | 1.53E-07 | -3.73E-07 |
| Stratospheric ozone depletion | DALY | 1.41E-03 | 7.36E-04 | -6.71E-04 |
| Ionizing radiation | DALY | -2.03E-04 | 2.73E-04 | 4.76E-04 |
| Ozone formation, Human health | DALY | 2.18E-02 | 1.66E-02 | -5.17E-03 |
| Fine particulate matter formation | DALY | 8.79E+01 | 3.37E+00 | -8.45E+01 |
| Ozone formation, Terrestrial ecosystems | species.yr | 3.14E-03 | 2.39E-03 | -7.49E-04 |
| Terrestrial acidification | species.yr | 4.30E-03 | 1.16E-03 | -3.14E-03 |
| Freshwater eutrophication | species.yr | 1.58E-03 | 8.48E-04 | -7.36E-04 |
| Marine eutrophication | species.yr | 2.44E-07 | 1.64E-07 | -8.05E-08 |
| Terrestrial ecotoxicity | species.yr | 2.69E-04 | 3.28E-04 | 5.85E-05 |
| Freshwater ecotoxicity | species.yr | 1.58E-04 | 1.98E-04 | 4.01E-05 |
| Marine ecotoxicity | species.yr | 3.43E-05 | 4.23E-05 | 8.05E-06 |
| Human carcinogenic toxicity | DALY | 4.43E-01 | 3.47E-01 | -9.62E-02 |
| Human non-carcinogenic toxicity | DALY | 1.73E+00 | 1.15E+00 | -5.80E-01 |
| Land use | species.yr | 2.22E-03 | 5.87E-04 | -1.63E-03 |
| Mineral resource scarcity | USD2013 | 3.33E+03 | 3.43E+03 | 1.03E+02 |
| Fossil resource scarcity | USD2013 | 9.55E+05 | 2.09E+05 | -7.46E+05 |
| Water consumption, Human health | DALY | 7.41E-02 | 5.51E-02 | -1.90E-02 |
| Water consumption, Terrestrial ecosystem | species.yr | 4.51E-04 | 3.35E-04 | -1.16E-04 |
| Water consumption, Aquatic ecosystems | species.yr | 2.02E-08 | 1.50E-08 | -5.17E-09 |

Table 7. Normalised endpoint results for the baseline and policy scenarios in Person Equivalent (PE).

| **Impact category** | **Unit** | **Baseline scenario**  **(1 year)** | **Policy scenario**  **(1 year)** | **Difference**  **(1 year)** |
| --- | --- | --- | --- | --- |
| Global warming, Human health | PE | 4.68E+02 | 1.36E+02 | -3.32E+02 |
| Global warming, Terrestrial ecosystems | PE | 2.10E+01 | 6.10E+00 | -1.49E+01 |
| Global warming, Freshwater ecosystems | PE | 5.74E-04 | 1.67E-04 | -4.07E-04 |
| Stratospheric ozone depletion | PE | 1.03E-01 | 5.39E-02 | -4.92E-02 |
| Ionizing radiation | PE | -1.49E-02 | 2.00E-02 | 3.49E-02 |
| Ozone formation, Human health | PE | 1.60E+00 | 1.22E+00 | -3.79E-01 |
| Fine particulate matter formation | PE | 6.44E+03 | 2.47E+02 | -6.20E+03 |
| Ozone formation, Terrestrial ecosystems | PE | 3.42E+00 | 2.60E+00 | -8.17E-01 |
| Terrestrial acidification | PE | 4.69E+00 | 1.27E+00 | -3.42E+00 |
| Freshwater eutrophication | PE | 1.73E+00 | 9.24E-01 | -8.02E-01 |
| Marine eutrophication | PE | 2.66E-04 | 1.78E-04 | -8.78E-05 |
| Terrestrial ecotoxicity | PE | 2.94E-01 | 3.57E-01 | 6.37E-02 |
| Freshwater ecotoxicity | PE | 1.73E-01 | 2.16E-01 | 4.37E-02 |
| Marine ecotoxicity | PE | 3.74E-02 | 4.62E-02 | 8.77E-03 |
| Human carcinogenic toxicity | PE | 3.25E+01 | 2.54E+01 | -7.05E+00 |
| Human non-carcinogenic toxicity | PE | 1.27E+02 | 8.45E+01 | -4.25E+01 |
| Land use | PE | 2.42E+00 | 6.39E-01 | -1.78E+00 |
| Mineral resource scarcity | PE | 1.36E+01 | 1.40E+01 | 4.20E-01 |
| Fossil resource scarcity | PE | 3.90E+03 | 8.54E+02 | -3.04E+03 |
| Water consumption, Human health | PE | 5.43E+00 | 4.04E+00 | -1.39E+00 |
| Water consumption, Terrestrial ecosystem | PE | 4.91E-01 | 3.65E-01 | -1.26E-01 |
| Water consumption, Aquatic ecosystems | PE | 2.20E-05 | 1.63E-05 | -5.64E-06 |

Table 8. Process contribution to the policy scenario impacts.

| Process | Global warming | Fine particulate matter formation | Human toxicity | Mineral resource scarcity | Fossil resource scarcity |
| --- | --- | --- | --- | --- | --- |
| Diesel burning | 49% | 68% | 8% | 0% | 0% |
| Diesel production | 11% | 19% | 0% | 0% | 63% |
| Diesel Genset | 0% | 0% | 0% | 5% | 0% |
| Li-ion Battery | 0% | 0% | 24% | 9% | 0% |
| PV electronic installation | 0% | 0% | 24% | 12% | 0% |
| PV panel | 30% | 23% | 1% | 46% | 27% |
| PV mounting system | 0% | 0% | 0% | 7% | 0% |
| Inverter | 0% | -20% | 37% | 21% | 0% |
| Assembling of PV | 8% | 0% | 0% | 0% | 0% |
| Others | 2% | 10% | 6% | 0% | 10% |

Table 9. Process contribution to the baseline scenario impacts.

| Process | Global warming | Fine particulate matter formation | Human toxicity | Mineral resource scarcity | Fossil resource scarcity |
| --- | --- | --- | --- | --- | --- |
| Kerosene | 78% | 95% | 12% | 14% | 78% |
| Batteries | 3% | 1% | 79% | 76% | 3% |
| Diesel genset (including burning) | 18% | 4% | 6% | 5% | 18% |
| SHS | 1% | 0% | 3% | 5% | 1% |

# Summary of data sources

Table 10. Summary of data sources and data used for the assessment of each impact category and specific impact.

| Impact categories included in the assessment | Specific impacts identified | Data source | Result (Country) |
| --- | --- | --- | --- |
| Climate Change mitigation | GHG emissions | Ecoinvent database. Data modelled through LCA using SimaPro. | see results in Table 1 of the article |
| Air pollution | Particulate matter | Ecoinvent database. Data modelled through LCA using SimaPro. | see results in Table 1 of the article |
| Human Toxicity | Human carcinogenic & non-carcinogenic toxicity | Ecoinvent database. Data modelled through LCA using SimaPro. | see results in Table 1 of the article |
| Depletion of non-renewable resources | Mineral resource depletion | Ecoinvent database. Data modelled through LCA using SimaPro. | see results in Table 1 of the article |
| Fossil resource depletion | Ecoinvent database. Data modelled through LCA using SimaPro. | see results in Table 1 of the article |
| Waste generation | Increased generation of e-waste from PV | (Magalini et al., 2016) | Lack of collection and recycling system (Kemya) |
| Stakeholders | One stakeholder involved in design and implementation of mini-grid has reported a general lack of waste management strategy for end of life of mini-grids (Kenya) |
| Reduced generation of waste from kerosene lamps, portable batteries and candles | (Lenz et al., 2017) | 90% of the households in the sample throw used dry-cell batteries into their pit latrines (Rwanda) |
| Access to clean, reliable and affordable energy | Access to clean, reliable and affordable electricity | Main objective of the policy  Expert judgement | - |
| Access to clean sources of cooking | (SE4All, 2013) | Information on which appliances can run with the level of electricity provided by the mini.grid (General) |
| (World Bank, 2008) | "Electricity is used for cooking only in a small minority of homes, less than 1 percent in most countries. Reasons for not using electricity are partially economic, partially social" (e.g. taste, misinformation) (Developing countries) |
| (International Energy Agency, 2017) | 16% of sub-Saharan Africa relying on electric cooking by 2030 (Energy for all scenario) (sub-Saharan region) |
| Accessibility and quality of education | Increased study time at school and home | (World Bank, 2008) | Increased study time at home of 77 minutes (Philippines) |
| (UNDESA 2014) | Extra teaching early in the day and late at night (Kenya) |
| (Kirubi et al., 2009) | 2-3 hours more spent in evening study at school (Kenya) |
| (Harrison et al., 2016) | From 1.7 to 3.1 hours of study more at home (Bangladesh) |
| (Lenz et al., 2017) | "Children study between 19 and 44 min longer after night- fall, although the total time children study does not increase significantly. Instead, children in households with electricity shift their study time from daytime to night-time" (Rwanda) |
| Quality of education facilities and teaching | (Azimoh et al., 2017) | "Electricity has enhanced the learning programs and the administration, allowing for computers to be used in classes, by teachers and by administrative staff" (Namibia) |
| (Kirubi et al., 2009) | "Access to electric power enabled schools to use mass media to supplement normal classroom instruction" (Kenya) |
| (UNDESA, 2014) | "Ability to conduct experiments in a science laboratory, computers, photocopying machines, vocational classes in engineering, welding, metal works, and carpentry" (Kenya) |
| (Riva et al., 2018) | "Electricity availability allows the use of new devices like computers, audio-tapes, TVs and radios for educational purposes, and fans for creating a more comfortable environment for all students, finally enhancing the teaching and learning quality, as well as the recruitment and hiring of teachers" (multiple developing countries) |
| Higher attendance and school performance | (World Bank 2008) | Generally, children with access to electricity, stay in schools longer (1.8 years more in case study in Philippines) |
| (Lenz et al. 2017) | The probability of households to send their children to school did not increase as a consequence of the national grid roll-out (Rwanda) |
| (Azimoh et al., 2017) | "According to the principal of the secondary school in Tsumkwe, the performance of students has not shown significant change since the access to electricity was improved" (Namibia) |
| (Lipscomb et al., 2013) | Strong effect on literacy and enrolment with increase in years of schooling (+2 years) (Brazil) |
| (Khandker et al., 2012) | Significant increase in school enrolment and years of completed schooling for both boys and girls (India) |
| (Van de Walle et al., 2013) | Significant positive effects of on enrollment and the average years of schooling for girls (India) |
| Food security | Improved food availability from improved agricultural productivity | (Ghosh Banerjee et al., 2017) | Theoretical explanation of links between energy and agriculture. Power is expected to impact agricultural activities especially on irrigation and milling. (General) |
| (Kirubi et al. 2009) | A community micro-grid allowed the use of welding machines, which made possible the fixing of tractors, which boosted agricultural productivity (Kenya) |
| Improved food availability from increased knowledge and information from telecommunication systems | (Riva et al. 2018) | Farmers and business activities in India and in Kenya benefited from receiving regular business information via television and radio and cell-phones. (multiple developing countries) |
| Stakeholders | Access to weather cast and information improved agricultural productivity, one stakeholder has experienced. (Kenya) |
| Improved food security from improved food storage due to refrigerators | (Azimoh et al., 2017); | Electricity allowed increased storage of food in refrigerators. Households eat more fresh foods than before (Namibia) |
| (Kirubi et al., 2009); | Electricity has enabled cold storage for farm products and other consumer goods, especially meat and milk (Kenya) |
| (Willcox et al., 2015) | Electricity enables local processing and storage reducing agricultural wastage (multiple developing countries) |
| Access to water | Improved access to water for drinking and productive uses | (Ringler & Lawford, 2013); | Theoretical links between energy and water, which can be used for desalination and groundwater pumping for domestic or productive uses. (General) |
| (World Bank, 2008) | Positive association between rural access to water and RE using source of water index (Kenya, Rwanda, Bangladesh, Egypt, Ghana) |
| Accessibility and quality of healthcare | Improved access to healthcare due better service in HCs and longer working hours | (World Bank 2008) | Rural clinics with electricity access are open longer (15.1 hours), compared to the ones without electricity (11 hours). (Kenya) |
| (Azimoh et al., 2017) | Health care delivery has improved because of the improved access to electricity. In the past they used candles and torches when delivering babies at night. Now they can use sophisticated medical equipment, and corpses can be stored in the morgue until burial. (Namibia) |
| (Riva et al., 2018) | Reporting a series of benefits among which longer operating hours, safer operations due to lighting, use of electric machines for X-rays and surgery, lower costs and improved communication with patients. (multiple developing countries) |
| (Lenz et al., 2017) | Reported benefits ranging from lighting, usage of medical machines and for administrative tasks, medicine storage and sterilizing, and attract staff from urban areas. (Rwanda) |
| Improved access to healthcare due to the possibility of storing vaccines | (Azimoh et al., 2017) | After electricity has improved clinics can store vaccines in refrigerators (Rwanda) |
| (World Bank, 2008) | Improved storage of vaccines, though this does not appear to affect immunization rates (multiple countries) |
| (Riva et al., 2018) | Refrigeration facilities allow for storing medications, vaccines and blood. (multiple developing countries) |
| (Winther, Ulsrud, & Saini, 2018) | Staff from a clinic has reported that the national grid electricity supply was unreliable for storing of vaccines (Kenya) |
| Gender equality and empowerment of women | Mobility at dark hours | (World Bank, n.d.) | Increased lighting grants women increased mobility at night and increases their sense of security (General) |
| (Azimoh et al., 2017) | Street lights along major streets has improved safety in the village at night. (Namibia) |
| Knowledge on health and family planning | (World Bank 2008) | Very strong evidence that access to television significantly increases women's knowledge on health and family planning (multiple developing countries) |
| Economic activity (community) | Business creation | (Willcox et al., 2015) | 30% increase in the number of enterprises both among electrified and non-electrified communities (Kenya) |
| (Pueyo and DeMartino 2018) | Businesses offering services connected with electricity have increased more than double in less than two years (Kenya) |
| (Lenz et al. 2017) | Slight increase in business creation, with more visible changes in communities with big trading centers (Rwanda) |
| Stakeholders | A stakeholder involved in the design and implementation of a mini-grid reported an increase in businesses after four years. (Kenya) |
| Increased productivity | (Kirubi et al., 2009) | 100-200% increase in productivity per worker, depending on the type of business (Kenya) |
| (Riva et al., 2018) | Most of the papers reporting effects of electricity on economic activities lack the use of a consistent methodology and do not report quantitative results. (General) |
| (Pueyo & DeMartino, 2018) | Implementation of mini-grids have not had the intended effect of improving business performance, reporting, small increases or statistically insignificant results (Kenya) |
| (Lenz et al., 2017) | Small increase in business activities and operating hours after four years. (Rwanda) |
| (Cook, 2011) | Access to markets and finance, infrastructures, such as roads, telecommunications, water systems, or complementary activities is essential, for achieving a high impact on economic production from electricity use. (Multiple developing countries) |
| (Prasad, 2008) |
| (Bhattacharyya & Palit, 2016) |
| Access to finance through mobile phones | (Winther et al., 2018) | Mobile payments is widespread in Kenya (Kenya) |
| (Kirubi et al., 2009) | Use of mobile payments increased as electricity became available (Kenya) |
| Stakeholders | Multiple stakeholders have reported the possibility of opening a bank account and use of mobile payments as an important impact of electricity access. (Kenya) |
| Employment | More jobs due to increasing activity of local industry | (CDC Group, 2016) | From literature, almost all the studies assessing employment and creation of new enterprises, found a positive correlation between these categories and access to electricity. (General) |
| (Riva et al., 2018) | Identifies increase in employment through two causal chain: increased productivity of existing activities, and based on the principle that electricity access increases free time. (General) |
| (Willcox et al., 2015) | A mini-grid program in brought a 20% increase in employment (Kenya) |
| (World Bank et al., 2017) | A mini-grid program, in Talek, has been reported of being responsible for the creation of 120 new local jobs (Kenya) |
| (Kirubi et al 2009) | 70% of the youth working at the local trading centre acquired their skills at the Polytechnic school of the village, where electricity access allowed better teaching. (Kenya) |
| (Lenz et al., 2017) | No significant effects on employment creation (Rwanda) |
| More jobs in the solar industry | (Juchau & Solan 2013) | solar PV is the second highest technology in terms of number of jobs per MWp (1.91 jobs/MWp/year), and the highest in terms of average MW production (12.84 jobs/MWa/year). (General) |
| Less jobs from kerosene, candles and batteries sectors | Expert judgment |  |
| Income | Increase in income of businesses | (Kirubi et al., 2009) | Increase in income of businesses ranging from 20-70% (Kenya) |
| (Willcox et al., 2015) | Up to 140% increase in income for households with access to electricity. (Kenya)  But from broader literature, findings not consistent. Lack of a positive correlation is caused by low consumption levels, equipment malfunction and lack of productive uses. (General) |
| (Jacobson, 2007) | Increased income from sales due to better business information through radio and TV and possibility to place orders through cell-phones (Kenya) |
| Household´s economy | (Lenz et al., 2017) | Impact is dependent on the socio-economic preconditions of the community (Rwanda) |
| (Pueyo & DeMartino, 2018) | Very little or statistically insignificant increase in sales and profits two years after the implementation of a mini-grid (Kenya) |
| (Riva et al., 2018) | Although many studies report benefits for the household economy (30% to 78% more than the unconnected), most of the studies do not provide statistically reliable estimates and a clear baseline. (multiple developing countries) |
| Economic growth | Increase GDP due to increase welfare in the communities | (CDC Group, 2016) | Cases from African countries underlines correlation, but case specific direction of causality. (African countries) |
| (Faisal et al., 2016) | Bi-directional causality from electricity consumption to GDP but no causality was found for GDP and energy consumption. (Russia) |
| (Jumbe, 2004) | Bi-directional causality between kWh and GDP suggesting that kWh and GDP are jointly determined, but one-way causality running from NGDP to kWh (Malawi) |
| (Shiu & Lam, 2004) | GDP and electricity consumption are cointegrated and there is unidirectional Granger causality running from electricity consumption to real GDP but not vice versa (China) |
| (Stern et al., 2017) | Correlation between electricity consumption and GDP, but poor evidence on causality. (multiple developing countries) |
| (Wolde-Rufael, 2006) | Long-run relationship between electricity consumption per capita and real GDP per capita for only 9 countries and Granger causality for only 12 countries, but mixed in direction of causality. (African countries) |
| Expenses for electricity | Monthly expenses with and without electricity | (Carbon Africa Limited et al., 2015) | Kerosene: 526 Ksh/month (household) 672 Ksh/month (business) (Kenya)  Batteries: 286 Ksh/month (household) 276 Ksh/month (business) (Kenya)  Diesel: 2197 Ksh/month (household) 4158 Ksh/month (business) (Kenya) |
| (Kenya diesel prices) | Diesel: 1.12 $/L (Kenya) |
| (Pueyo & DeMartino, 2018) | Kerosene: 210 Ksh/week (Kenya)  Batteries: 198 Ksh/week (Kenya)  Candles: 80 Ksh/week (Kenya)  SHS: 112 Ksh/week (Kenya)  Diesel: 1086 Ksh/week; 1.4 L diesel/day/user (Kenya) |
| (Rom et al., 2017) | Kerosene: 2.08 $/month (Kenya)  Phones: 0.42 $/month (Kenya) |
| (Van Acker et al., 2014) | Kerosene: 4.65 $/month (Kenya)  Batteries: 3.50 $/month (Kenya)  Candles: 0.65 $/month (Kenya)  Phones: 2.06 $/month (Kenya) |
| (Economic Consulting Associates et al., 2014) | Diesel: 4.17 L diesel/day/user (Kenya) |

# Summary of qualitative impact assessment

Table 11. Summary of the qualitative impact assessment.

| Impact categories included in the assessment | Specific impacts identified | Jurisdiction | Likelihood | Magnitude | Positive / Negative | Significant? | Summary of qualitative assessment results for each impact category |
| --- | --- | --- | --- | --- | --- | --- | --- |
| Waste generation | Increased generation of e-waste from PV | In | Possible | Major | - | Yes | Overall possible negative impacts from increased generation of e-waste from PV but likely positive impacts from reduced dry-cell batteries and SHS related waste |
| Reduced generation of waste from kerosene lamps, portable batteries and candles | In | Likely | Moderate | + | Yes |
| Access to clean, reliable and affordable energy | Access to clean, reliable and affordable electricity | In | Very likely | Major | + | Yes | Important positive impacts from substitution of traditional lighting (primarily) and cooking fuels with modern sources of energy. |
| Access to clean sources of cooking | In | Possible | Minor | + | No |
| Accessibility and quality of education | Increased study time at school and home | In | Likely | Minor | + | No | Moderate increase in quality of education and minor increase in access to education. |
| Quality of education facilities and teaching | In | Likely | Moderate | + | Yes |
| Higher attendance and school performance | In | Possible | Minor | + | No |
| Food security | Improved food availability from improved agricultural productivity | In | Unlikely | Major | + | No | Likely improvements on food security due to storage of food. Likely small improvements on agricultural productivity due to better knowledge. |
| Improved food availability from increased knowledge and information from telecommunication systems | In | Likely | Minor | + | No |
| Improved food security from improved food storage due to refrigerators | In | Likely | Moderate | + | Yes |
| Access to water | Improved access to water for drinking and productive uses | In | Unlikely | Moderate | + | Yes | Moderate improvements are possible, but likelihood is uncertain. |
| Accessibility and quality of healthcare | Improved access to healthcare due better service in HCs and longer working hours | In | Likely | Moderate | + | Yes | Moderate improvements in accessibility and quality of healthcare. |
| Improved access to healthcare due to the possibility of storing vaccines | In | Likely | Moderate | + | Yes |
| Gender equality and empowerment of women | Mobility at dark hours | In | Likely | Moderate | + | Yes | Moderate positive effects on women empowerment. |
| Knowledge on health and family planning | In | Possible | Minor | + | Yes |
| Economic activity (community) | Business creation | In | Likely | Moderate | + | Yes | Moderate and likely improvement for the economic activity in the community, provided that productive use of energy is promoted. |
| Increased productivity | In | Likely | Minor | + | No |
| Access to finance through mobile phones | In | Very likely | Minor | + | No |
| Employment | More jobs due to increasing activity of local industry | in | Likely | Minor | + | Yes | Minor improvements likely to be seen in the level of the employment in the community and moderate improvement in the energy sector. |
| More jobs in the solar industry | in/out | Likely | Moderate | + | Yes |
| Less jobs from kerosene, candles and batteries sectors | In/out | Possible | Unknown | - | Yes |
| Income | Increase in income of businesses | In | Possible | Moderate | + | Yes | Possible moderate improvements in income levels in the community, depending of certain preconditions. |
| Household´s economy | In | Possible | Moderate | + | Yes |
| Economic growth | Increase GDP due to increase welfare in the communities | In | Possible | Moderate | + | Yes | Possible moderate improvements in GDP |

# Links between impact categories and SDGs targets

Table 12. Links between impact categories/specific impacts and the SDGs targets.

| Impact category | SDGs target | Reason |
| --- | --- | --- |
| Climate Change mitigation | **9.4** By 2030, upgrade infrastructure and retrofit industries to make them sustainable, with increased resource-use efficiency and greater adoption of clean and environmentally sound technologies and industrial processes, with all countries taking action in accordance with their respective capabilities  **13.2** Integrate climate change measures into national policies, strategies and planning | **9.4** The impact on climate change mitigation of the policy increases resource-use efficiency and consists in an adoption of clean and environmentally sound technology  **13.2** The policy considered is a climate change measure |
| Air pollution  (Indoor and Outdoor) | **3.9** By 2030, substantially reduce the number of deaths and illnesses from hazardous chemicals and air, water and soil pollution and contamination  **11.6** By 2030, reduce the adverse per capita environmental impact of cities, including by paying special attention to air quality and municipal and other waste management | **3.9** Air pollution, such as the one avoided in the policy scenario affects the number of deaths and illnesses from air contamination  **11.6** The category air pollution connects with air quality of cities. The SDG indicator of this target is also expressed in PM2.5. |
| Human Toxicity (Air, water and soil) | **3.9** By 2030, substantially reduce the number of deaths and illnesses from hazardous chemicals and air, water and soil pollution and contamination | **3.9** Human toxicity impacts evaluated in the case study causes deaths and illnesses from water, air and soil pollution |
| Depletion of non-renewable resources | **12.2** By 2030, achieve the sustainable management and efficient use of natural resources | **12.2** The impact categories on fossil and mineral resources evaluated keep track of the efficient use of natural resources |
| Waste generation and disposal | **12.4** By 2020, achieve the environmentally sound management of chemicals and all wastes throughout their life cycle, in accordance with agreed international frameworks, and significantly reduce their release to air, water and soil in order to minimize their adverse impacts on human health and the environment  **12.5** By 2030, substantially reduce waste generation through prevention, reduction, recycling and reuse | **12.4** The specific impacts on “Increased generation of e-waste from PV” and “Reduced generation of waste from kerosene lamps, portable batteries and candles” will have an effect on the management of waste and its impacts on humans and environment.  **12.5** The same specific impacts will also have an effect on prevention and reduction of waste |
| Accessibility and quality of health care | **3.8** Achieve universal health coverage, including financial risk protection, access to quality essential health-care services and access to safe, effective, quality and affordable essential medicines and vaccines for all  **3.b** Support the research and development of vaccines and medicines for the communicable and non‑communicable diseases that primarily affect developing countries, provide access to affordable essential medicines and vaccines, in accordance with the Doha Declaration on the TRIPS Agreement and Public Health, which affirms the right of developing countries to use to the full the provisions in the Agreement on Trade-Related Aspects of Intellectual Property Rights regarding flexibilities to protect public health, and, in particular, provide access to medicines for all | **3.8** The specific impacts on “Improved access to healthcare due better service in HCs and longer working hours” and “Improved access to healthcare due to the possibility of storing vaccines” are connected with accessing quality essential health-care services and vaccines for all  **3.b** The specific impact “Improved access to healthcare due to the possibility of storing vaccines” supports SDG target 3.b by providing better access to vaccines to clinics |
| Food security | **2.3** By 2030, double the agricultural productivity and incomes of small-scale food producers, in particular women, indigenous peoples, family farmers, pastoralists and fishers, including through secure and equal access to land, other productive resources and inputs, knowledge, financial services, markets and opportunities for value addition and non-farm employment | **2.3** The specific impacts “agricultural productivity” and “knowledge and information from telecommunication systems” will affect agricultural productivity of small-scale food producers, through productive resources and inputs, and knowledge |
| Access to safe drinking water | **6.1** By 2030, achieve universal and equitable access to safe and affordable drinking water for all | **6.1** The specific impacts “Improved access to water for drinking and productive uses” will affect access to safe and affordable drinking water for all |
| Access to clean, reliable and affordable energy | **7.1** By 2030, ensure universal access to affordable, reliable and modern energy services  **7.2** By 2030, increase substantially the share of renewable energy in the global energy mix  **7.b** By 2030, expand infrastructure and upgrade technology for supplying modern and sustainable energy services for all in developing countries, in particular least developed countries, small island developing States and landlocked developing countries, in accordance with their respective programmes of support | **7.1** The specific impacts “Access to clean, reliable and affordable electricity” and “Access to clean sources of cooking” contribute to access to affordable, reliable and modern energy services  **7.2** The access to energy evaluated in this impact category will happen through use of renewable energy, which substitutes fossil fuels  **7.b** The access to energy evaluated in this impact category consists of infrastructures and upgrade technologies supplying modern and in developing countries |
| Accessibility and quality of education | **4.1** By 2030, ensure that all girls and boys complete free, equitable and quality primary and secondary education leading to relevant and effective learning outcomes  **4.6** By 2030, ensure that all youth and a substantial proportion of adults, both men and women, achieve literacy and numeracy  **4.a** Build and upgrade education facilities that are child, disability and gender sensitive and provide safe, non-violent, inclusive and effective learning environments for all  **4.c** By 2030, substantially increase the supply of qualified teachers, including through international cooperation for teacher training in developing countries, especially least developed countries and small island developing States | **4.1** “Higher attendance and school performance” will help in ensuring that all girls and boys complete free, equitable and quality primary and secondary education  **4.6** “Higher attendance and school performance” will help in ensuring that all youth and a substantial proportion of adults, both men and women, achieve literacy and numeracy  **4.a** Through “Increased quality of facilities and teaching” the action upgrades education facilities  **4.c** The specific impact “Increased quality of facilities and teaching” has analysed the effects on the supply of qualified teachers |
| Gender equality and empowerment of women | **5.6** Ensure universal access to sexual and reproductive health and reproductive rights as agreed in accordance with the Programme of Action of the International Conference on Population and Development and the Beijing Platform for Action and the outcome documents of their review conferences  **11.7** By 2030, provide universal access to safe, inclusive and accessible, green and public spaces, in particular for women and children, older persons and persons with disabilities | **5.6** Through the specific impact “Knowledge on health and family planning” the action will support access to sexual and reproductive health  **11.7** By increasing “Mobility at dark hours” the action will provide access to safer public spaces, in particular for women and children |
| Economic activity at community level | **8.3** Promote development-oriented policies that support productive activities, decent job creation, entrepreneurship, creativity and innovation, and encourage the formalization and growth of micro-, small- and medium-sized enterprises, including through access to financial services  **1.4** By 2030, ensure that all men and women, in particular the poor and the vulnerable, have equal rights to economic resources, as well as access to basic services, ownership and control over land and other forms of property, inheritance, natural resources, appropriate new technology and financial services, including microfinance | **8.3** Both through the specific impacts on “Business creation” and “Increased productivity” the policy supports productive activities, entrepreneurship, and growth of micro-, small- and medium-sized enterprises  **1.4** By providing “Access to finance through mobile phones” the actions ensures that, in particular the poor, have access to basic services, appropriate new technology and financial services, including microfinance |
| Employment | **8.5** By 2030, achieve full and productive employment and decent work for all women and men, including for young people and persons with disabilities, and equal pay for work of equal value | **8.5** The policy connects with this target by increasing full and productive employment through “More jobs due to increasing productivity of local industry” “More jobs in the solar industry” and “Less jobs from kerosene, candles and batteries sectors” |
| Expenses for electricity | No links have been found | - |
| Income | **10.1** By 2030, progressively achieve and sustain income growth of the bottom 40 per cent of the population at a rate higher than the national average | **10.1** By “increase in income of businesses” and impacts on “Household´s economy” the policy supports income growth of the bottom 40 per cent of the population |
| Economic growth | **8.1** Sustain per capita economic growth in accordance with national circumstances and, in particular, at least 7 per cent gross domestic product growth per annum in the least developed countries | **8.1** The assessment explores the effects of the policy on economic growth in a developing country |

# Calculation of CO2 abatement cost

Table 13. Calculation of CO2 abatement for the K-OSAP mini-grids using GACMO.

| Costs in | Reduction | Reference | Increase |
| --- | --- | --- | --- |
| US$ | Option1 | Option1 | (Red.-Ref.) |
| Total investment | 20,000,000 |  |  |
| Project life | 25 |  |  |
| Lev. investment | 2,203,361 |  | 2,203,361 |
| Annual O&M | 0 |  | 0 |
| Annual fuelcost | 2,035,7282 | 3,802,9203 | -1,767,192 |
| Total annual cost | 4,239,089 | 3,802,920 | **436,169** |
|  |  |  |  |
| Annual emissions (tons) | Tons | Tons | Reduction |
| Fuel CO2-eq. emission | 1,658 | 5,718 | 4,061 |
| Other |  |  |  |
| Total CO2-eq. emission | 1,658 | 5,718 | **4,061** |
|  |  |  |  |
| **US$/ton CO2-eq.** |  |  | **107.4** |

1 Considering only the 121 mini-grids developed under the K-OSAP Project.

2 Calculated assuming an average monthly expense of between 1.76 and 10.90 USD (=6.33 USD).

3 Calculated assuming an average monthly expense between 10.10 and 13.55 USD (=11.83 USD).

# Quantitative relative improvements on SDG targets

Figure 3. Improvements on SDG targets relative to baseline scenario from the impacts assessed quantitatively

# Additional references

Barman, J. (2011). Design and feasibility study of PV systems in Kenya - A case study. Retrieved from http://studentarbeten.chalmers.se/publication/149869-design-and-feasibility-study-of-pv-systems-in-kenya-a-case-study

Brundtland, G. H. (1987). Our Common Future: Report of the World Commission on Environment and Development. *United Nations Commission*, *4*(1), 300. https://doi.org/10.1080/07488008808408783

Climate Community & Biodiversity Alliance, & VCS. (2017). ICAT Stakeholder Participation Guidance.

Economic Consulting Associates, Trama Tecno Ambiental, & Access Energy. (2014). Project Design Study on the Renewable Energy Development for Off-Grid Power Supply in Rural Regions of Kenya Project. Retrieved from http://www.renewableenergy.go.ke/asset_uplds/files/ECA Kenya Minigrids Report - revised final(1).pdf

Espinosa, N., García-Valverde, R., & Krebs, F. C. (2011). Life-cycle analysis of product integrated polymer solar cells. *Energy & Environmental Science*, *4*(5), 1547. https://doi.org/10.1039/c1ee01127h

Fan, C.-W., & Zhang, J. (Jim). (2001). Characterization of emissions from portable household combustion devices: particle size distributions, emission rates and factors, and potential exposures. *Atmospheric Environment*, *35*(7), 1281–1290. https://doi.org/10.1016/S1352-2310(00)00399-X

Government of Kenya. (2013). *National Climate Change Action Plan 2013 -2017*.

Lam, N. L., Chen, Y., Weyant, C., Venkataraman, C., Sadavarte, P., Johnson, M. A., … Bond, T. C. (2012). Household light makes global heat: high black carbon emissions from kerosene wick lamps. *Environmental Science & Technology*, *46*(24), 13531–13538. https://doi.org/10.1021/es302697h

Ministry of Devolution and Planning of Kenya. (2017). Implementation of the Agenda 2030 for Sustainable Development in Kenya.

Rosenbaum, R. K., Hauschild, M. Z., Boulay, A.-M., Fantke, P., Laurent, A., Núñez, M., & Vieira, M. (2018). Life Cycle Impact Assessment. In *Life Cycle Assessment* (pp. 167–270). Cham: Springer International Publishing. https://doi.org/10.1007/978-3-319-56475-3_10

U.S. Energy Information Administration (EIA). (2016). Carbon Dioxide Emissions Coefficients. Retrieved June 14, 2018, from https://www.eia.gov/environment/emissions/co2_vol_mass.php

1. Including emission occurring both in 2024 and 2030. [↑](#footnote-ref-1)
2. The burden free approach states that waste products come for free and do not therefore carry any environmental impact. Hence, they can be excluded from the system. [↑](#footnote-ref-2)
3. Including emission occurring both in 2024 and 2030. [↑](#footnote-ref-3)
4. Considering a solar Annual average solar radiation of 2100 kW/m2 (Barman, 2011) and a performance ratio of 0.8. [↑](#footnote-ref-4)
